# Supplementary material for: Spatial variations and associated factors of modern contraceptive use in Ethiopia: a spatial and multilevel analysis
Source: PubMed Central journal article supplement — BMJ Open. 2020 Oct 12;10(10):e037532. doi: 10.1136/bmjopen-2020-037532 (PMC7552846; doi:10.1136/bmjopen-2020-037532), 2020-10-12
Supplement: bmjopen-2020-037532.draft_revisions.pdf [file bmjopen-2020-037532.draft_revisions.pdf]

# BMJ Open

BMJ Open is committed to open peer review. As part of this commitment we make the peer review history of every article we publish publicly available.

When an article is published we post the peer reviewers' comments and the authors' responses online. We also post the versions of the paper that were used during peer review. These are the versions that the peer review comments apply to.

The versions of the paper that follow are the versions that were submitted during the peer review process. They are not the versions of record or the final published versions. They should not be cited or distributed as the published version of this manuscript.

BMJ Open is an open access journal and the full, final, typeset and author-corrected version of record of the manuscript is available on our site with no access controls, subscription charges or pay-per-view fees (<http://bmjopen.bmj.com>).

If you have any questions on BMJ Open's open peer review process please email [info.bmjopen@bmj.com](mailto:info.bmjopen@bmj.com)

# BMJ Open

## Modern contraceptive use in Ethiopia: a spatial and multilevel analysis

|                               |                                                                                                                                                                                                                                                                                                                                                                                                                                                                                                                                                                                                      |
|-------------------------------|------------------------------------------------------------------------------------------------------------------------------------------------------------------------------------------------------------------------------------------------------------------------------------------------------------------------------------------------------------------------------------------------------------------------------------------------------------------------------------------------------------------------------------------------------------------------------------------------------|
| Journal:                      | <i>BMJ Open</i>                                                                                                                                                                                                                                                                                                                                                                                                                                                                                                                                                                                      |
| Manuscript ID                 | bmjopen-2020-037532                                                                                                                                                                                                                                                                                                                                                                                                                                                                                                                                                                                  |
| Article Type:                 | Original research                                                                                                                                                                                                                                                                                                                                                                                                                                                                                                                                                                                    |
| Date Submitted by the Author: | 07-Feb-2020                                                                                                                                                                                                                                                                                                                                                                                                                                                                                                                                                                                          |
| Complete List of Authors:     | Tegegne, Teketo; Debre Markos University, Public Health; The University of Newcastle, School of Medicine and Public Health<br>Chojenta, Catherine; The University of Newcastle, School of Medicine and Public Health<br>Forder, Peta; The University of Newcastle, School of Medicine and Public Health<br>Zemedu, Theodros ; Ethiopian Public Health Institute, Health System and Reproductive Health Research Directorate<br>Smith, Roger; The University of Newcastle School of Medicine and Public Health,<br>Loxton, Deborah; The University of Newcastle, School of Medicine and Public Health |
| Keywords:                     | EPIDEMIOLOGY, PUBLIC HEALTH, REPRODUCTIVE MEDICINE, STATISTICS & RESEARCH METHODS                                                                                                                                                                                                                                                                                                                                                                                                                                                                                                                    |
|                               |                                                                                                                                                                                                                                                                                                                                                                                                                                                                                                                                                                                                      |

SCHOLARONE™  
Manuscripts

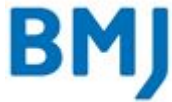

I, the Submitting Author has the right to grant and does grant on behalf of all authors of the Work (as defined in the below author licence), an exclusive licence and/or a non-exclusive licence for contributions from authors who are: i) UK Crown employees; ii) where BMJ has agreed a CC-BY licence shall apply, and/or iii) in accordance with the terms applicable for US Federal Government officers or employees acting as part of their official duties; on a worldwide, perpetual, irrevocable, royalty-free basis to BMJ Publishing Group Ltd ("BMJ") its licensees and where the relevant Journal is co-owned by BMJ to the co-owners of the Journal, to publish the Work in this journal and any other BMJ products and to exploit all rights, as set out in our [licence](#).

The Submitting Author accepts and understands that any supply made under these terms is made by BMJ to the Submitting Author unless you are acting as an employee on behalf of your employer or a postgraduate student of an affiliated institution which is paying any applicable article publishing charge ("APC") for Open Access articles. Where the Submitting Author wishes to make the Work available on an Open Access basis (and intends to pay the relevant APC), the terms of reuse of such Open Access shall be governed by a Creative Commons licence – details of these licences and which [Creative Commons](#) licence will apply to this Work are set out in our licence referred to above.

Other than as permitted in any relevant BMJ Author's Self Archiving Policies, I confirm this Work has not been accepted for publication elsewhere, is not being considered for publication elsewhere and does not duplicate material already published. I confirm all authors consent to publication of this Work and authorise the granting of this licence.

## Modern contraceptive use in Ethiopia: a spatial and multilevel analysis

Teketo Kassaw Tegegne <sup>1,2,4\*</sup>, Catherine Chojenta <sup>2</sup>, Peta Forder <sup>2</sup>, Theodros Getachew <sup>5</sup>,  
Roger Smith <sup>3</sup>, Deborah Loxton <sup>2</sup>

<sup>1</sup> Department of Public Health, College of Health Sciences, Debre Markos University, Debre Markos, Ethiopia

<sup>2</sup> Research Centre for Generational Health and Ageing, Hunter Medical Research Institute, School of Medicine and Public Health, University of Newcastle, Newcastle, New South Wales, Australia

<sup>3</sup> Mothers and Babies Research Centre, Hunter Medical Research Institute, School of Medicine and Public Health, University of Newcastle, Newcastle, New South Wales, Australia

<sup>4</sup> The Australian College of Health Informatics, Sydney, New South Wales, Australia

<sup>5</sup> Health System and Reproductive Health Research Directorate, Ethiopian Public Health Institute, Addis Ababa, Ethiopia

### Email address:

TKT: [kteketo@yahoo.com](mailto:kteketo@yahoo.com) or [TeketoKassaw.Tegegne@uon.edu.au](mailto:TeketoKassaw.Tegegne@uon.edu.au)

CC: [Catherine.Chojenta@newcastle.edu.au](mailto:Catherine.Chojenta@newcastle.edu.au)

PF: [peta.forder@newcastle.edu.au](mailto:peta.forder@newcastle.edu.au)

TG: [tedi.getachew@yahoo.com](mailto:tedi.getachew@yahoo.com)

RS: [Roger.Smith@newcastle.edu.au](mailto:Roger.Smith@newcastle.edu.au)

DL: [Deborah.Loxton@newcastle.edu.au](mailto:Deborah.Loxton@newcastle.edu.au)

\* **Corresponding author**

## Abstract

**Objective:** To assess spatial variations in modern contraceptive use and to identify factors associated with it among married women in Ethiopia.

**Design:** Cross-sectional analysis of population-based and health facility data.

**Setting:** Ethiopia Demographic and Health Survey data linked to Service Provision Assessment data.

**Population:** Eight thousand four hundred and seventy-three married women and 1020 facilities that reported providing family planning services.

**Methods:** A linked secondary data analysis of population and health facility data was carried out. Both multilevel and spatial analyses were conducted to identify key determinants of women's use of modern contraceptive and spatial clustering of modern contraceptive use.

**Main outcome measure:** Modern contraceptive use.

**Results:** About 24% of the variation in the use of modern contraception was accounted for by location. A one-unit increase in the mean score of health facilities' readiness to provide short-term modern contraceptives in a typical region was associated with a 20-fold increase in the odds of modern contraceptive use. In the spatial analysis, it was found that Addis Ababa and the Amhara region had high clusters of modern contraceptive use rates. On the other hand, low rates of contraceptive use were clustered in the Afar and Somali regions.

**Conclusion:** There were significant variations in the use of modern contraceptives across the different regions of Ethiopia. Therefore, regions with low contraceptive rates and high fertility rates should be targeted for scaling up and tailoring of services to the culture and lifestyles of the population of those regions.

**Keywords:** Modern contraceptives, spatial variations, family planning methods

### Strengths and limitations of this study

- This study identified both the demand and supply-side determinants of modern contraceptive utilization using a linked population and health facility data.
- In addition to multilevel analysis, this study used spatial analyses to identify geographical variations of modern contraceptive utilization.
- This study excluded DHS clusters without geographic coordinates, and used sampled health facilities that might under or overestimate the study finding.
- This study did not consider sampling weights while running the multilevel analysis.
- DHS surveys provide an average weight (hv005 or v005); however, the GLIMMIX procedure in SAS requires weights at each level that did not enable to apply sampling weights in the multilevel analysis.

## Background

Worldwide, modern contraceptives are believed to be important in fertility control (1). Especially for those in developing countries, contraceptives have a clear effect on the health of women, children, and families. For instance, contraceptives are estimated to prevent 2.7 million infant deaths and the loss of 60 million healthy lives a year worldwide (2). In countries with high fertility rates, promoting contraceptives averts 32% of all maternal deaths and approximately 10% of child mortality. Modern contraceptives also make a huge contribution to the achievement of universal primary schooling, female empowerment, and in reducing poverty and hunger (3). Family planning is also important in preventing unintended pregnancies and unsafe abortions (4, 5).

In spite of the above-mentioned importance, access and utilization of modern contraceptives vary worldwide. Women in developed countries have better access and use as compared to those from developing countries (4). In one study, from 2010 – 2014, it was reported that the global burden of unintended pregnancies was 44%. The rate of unintended pregnancies is substantially higher in developing countries as compared to developed regions (6). Higher levels of unmet need for contraception could contribute to higher rates of unintended pregnancies in developing regions. For instance, in sub-Saharan Africa, the prevalence of contraceptive use among reproductive-age women is only 17% (7).

Similarly, the utilization of modern contraceptives is a common healthcare challenge in Ethiopia. Even though there is an increase in women's use of modern contraceptives, still challenges remain (8). Discrepancies in the use of modern contraceptives are common within the different parts of the country. For instance, the Somali region accounts for the lowest rate of modern contraceptive use (1.4%) as compared to Addis Ababa (50.1%) (8).

The utilization of modern contraceptives could be influenced by both demand and supply-side factors. In previous studies, more emphasis was given on the importance of demand-side factors (7). Most of the investigated demand-side factors were women's education (7, 9) and age (9, 10), household wealth (7, 9, 11) and parity (12, 13). The importance of supply-side factors has been largely overlooked. In some studies, it was reported that the quality of family planning services (14), and living close to a family planning facility (15) were significantly associated with modern contraceptive utilization. In east Africa, it was observed that the

1  
2  
3 utilization of modern contraceptives was higher among facilities providing different  
4 contraceptive methods and with a higher family planning service environment scores (16).  
5  
6  
7

8 Due to the increasing availability of geographically referenced health facility and population  
9 data, it is possible to do geographically linked analyses (17). This opportunity allows  
10 identification of the location of existing health facilities as well as mapping the eligible  
11 population without access to a particular health service, such as family planning. This further  
12 enables identification of both the demand and supply-side factors and helps the government  
13 determine where future investments should be targeted. Therefore, this study aimed to assess  
14 the spatial variations in the use of modern contraceptives among married women in Ethiopia.  
15 Furthermore, it aimed to identify the potential factors associated with the use of modern  
16 contraceptives among married women throughout the country, using the national population  
17 and health facility data.  
18  
19  
20  
21  
22  
23  
24  
25

## 26 **Methods**

### 27 **Data sources**

28 The main data sources of this study were the 2016 Ethiopia Demographic and Health Survey  
29 (EDHS) and the 2014 Ethiopian Service Provision Assessment Plus (ESPA+). The 2016 EDHS  
30 had information on population characteristics, such as contraception and obstetric care use. The  
31 survey details found elsewhere (8, 17). The latitude and longitude of each survey cluster were  
32 also collected (18). In this analysis, 8,473 married women were included.  
33  
34  
35  
36  
37  
38  
39

40 The main source of the health facility data was the 2014 ESPA+ survey (19). The ESPA+  
41 survey had information on service availability and readiness, including family planning  
42 services (19). Details of the survey found elsewhere (17, 19). In this analysis, 1,020 facilities  
43 that reported providing family planning services were included.  
44  
45  
46  
47

### 48 **Data linking method**

49 In this study, we used an administrative boundary link for linking health facility data with the  
50 population data (17). Details of this method found elsewhere (17). Ethiopia's administrative  
51 boundaries, used in this study, were obtained from Natural Earth (20).  
52  
53  
54  
55  
56  
57  
58  
59  
60



## Health service environment

Four health service environment variable scores were created. All service availability and readiness scores were computed for the nearest family planning providing facilities. Details of this computation found elsewhere (17). Average straight-line distance to the nearest family planning providing facility was calculated after linking each DHS cluster with SPA facility (17). First, the distance from each cluster to every family planning providing facility within the administrative boundaries was calculated. Second, the nearest family planning providing facility was identified and the average distance was computed per region.

With regard to the general service readiness score, eight general service readiness dimensions were obtained using principal component analysis (17). The average general service readiness score per region/city administration was computed using the SAS SCORE procedure. The first two principal components were used to compute two general service readiness scores (health facility management system and infrastructure). Furthermore, indices of family planning availability and readiness were computed. Two family planning availability scores (long-acting and short-term contraceptives methods) were created using seven variables (17). Similarly, two-family planning readiness scores (readiness to provide long-acting and short-term contraceptives) were created using seven variables (17).

A woman was considered to be using modern contraception if she used any of the modern contraceptive methods with the exception of male condoms (17). The male condom could be accessed from shops that the SPA survey did not capture.

## Statistical analysis

### Multilevel analysis

To account for the nested nature of DHS data, a two-level generalized linear mixed model was used. This study had binary outcomes: whether a married woman used modern contraception or not. We were interested in the probability of modern contraceptive utilization and the influence of individual and region-level characteristics. The equation used to estimate the two-level hierarchical model found elsewhere (17).

Binary distribution with the logit link function was used to model this binary outcome. To estimate this model, the GLIMMIX procedure in SAS was used (21). Four model building process was carried out. The Laplace estimation was used for estimating these models. The model building process was started with an empty model. The variance estimate from this

1  
2  
3 model was used to calculate the intra-class correlation coefficient (ICC) (21). Details of  
4 calculating ICC in hierarchical generalized linear models found elsewhere (17, 22). By  
5 checking improvements in model fit, complex models were built step by step. The negative  
6 two log-likelihood, Akaike Information Criteria (AIC) and Bayesian Information Criteria  
7 (BIC) were used to assess the best fitting model (21).  
8  
9  
10  
11  
12

### 13 **Spatial analysis**

14 ArcGIS 10.6.1 was used to do spatial analyses. The Ethiopian Polyconic Projected Coordinate  
15 System (17) was used to flatten the Ethiopian map. Hot spot analysis was carried out to identify  
16 spatial clusters of modern contraceptive use. DHS clusters were the unit of spatial analyses.  
17  
18  
19

20  
21 We followed three analyses procedures while doing the hot spot analysis as discussed  
22 elsewhere (17). First, we run the Global Moran's I statistic; it is a global measure of spatial  
23 autocorrelation (23). Second, based on the Global Moran's I statistic, Incremental Spatial  
24 Autocorrelation was run to determine the critical distance at which clustering of modern  
25 contraception prevalence rate (mCPR) was peaked (165 kilometres) (17). Lastly, the Getis-Ord  
26  $G_i^*$  statistic was run to identify statistically significant spatial clusters of mCPR (17). The two  
27 statistical problems of local statistics of spatial association (multiple comparison and spatial  
28 dependence) were controlled using a False Discovery Rate (FDR) correction (17, 24).  
29  
30  
31  
32  
33  
34  
35

### 36 **Patient and public involvement**

37  
38 This study used secondary data sets: 2016 EDHS and 2014 ESPA+ that were previously  
39 collected with confidentiality information maintained (no personal identifier used). The data  
40 were collected under the collaboration of The Ethiopian Federal Ministry of Health, Ethiopian  
41 Central Statistical Agency, Ethiopian Public Health Institute and USAID. Hence, as we did not  
42 collect the data directly from participants, no recruitment and contact of participants were  
43 required. Thus, to access these data sets, ethical approval was obtained from the DHS program  
44 Institutional Review Board and Ethiopian Public Health Institute. Furthermore, this study was  
45 ethically approved by the Human Research Ethics Committee, The University of Newcastle on  
46 March 20, 2018 with a reference number H-2018-0066.  
47  
48  
49  
50  
51  
52  
53  
54  
55  
56  
57  
58  
59  
60

## Results

### Sociodemographic characteristics

The mean age of the study participants was 31.09 (standard deviation of  $\pm 8.22$ ) years. Approximately 22% of respondents were within the age range of 25 – 29 years. Over 57% of the women had no education, while 27.58% had a primary level education. With regard to wealth, 29.26% of the women fell in the richest quintile and 27.86% were grouped in the poorest quintile. About 38% and 41% of the respondents were followers of the Orthodox Christian and Muslim faith, respectively. Seventy-three percent of the respondents were from rural areas (Table 1).

Table 1: Sociodemographic characteristics of married women in Ethiopia, 2016 (N = 8,473)

| Variable                              |                   | Frequency | Percentage |
|---------------------------------------|-------------------|-----------|------------|
| <b>Age</b>                            | 15 – 19           | 534       | 6.30       |
|                                       | 20 – 24           | 1436      | 16.95      |
|                                       | 25 – 29           | 1876      | 22.14      |
|                                       | 30 – 34           | 1591      | 18.78      |
|                                       | 35 – 39           | 1412      | 16.66      |
|                                       | 40 – 44           | 953       | 11.25      |
|                                       | 45 – 49           | 671       | 7.92       |
| <b>Women's education</b>              | No education      | 4869      | 57.46      |
|                                       | Primary           | 2337      | 27.58      |
|                                       | Secondary         | 773       | 9.12       |
|                                       | Higher            | 494       | 5.83       |
| <b>Women's occupation</b>             | Have no work      | 6030      | 71.17      |
|                                       | Professional work | 1310      | 15.46      |
|                                       | Agricultural work | 749       | 8.84       |
|                                       | Others            | 384       | 4.53       |
|                                       |                   |           |            |
| <b>Husbands'/partners' education</b>  | No education      | 3774      | 44.54      |
|                                       | Primary           | 2651      | 31.29      |
|                                       | Secondary         | 1060      | 12.51      |
|                                       | Higher            | 988       | 11.66      |
| <b>Husbands'/partners' occupation</b> | Have no work      | 851       | 10.04      |
|                                       | Professional work | 2592      | 30.59      |
|                                       | Agricultural work | 4208      | 49.66      |
|                                       | Others            | 822       | 9.70       |
| <b>Head of household</b>              | Someone else      | 7147      | 84.35      |
|                                       | Herself           | 1326      | 15.65      |
| <b>Family size</b>                    | 1 – 4             | 3050      | 36.00      |
|                                       | 5 – 8             | 4564      | 53.86      |
|                                       | >= 9              | 859       | 10.14      |
| <b>Wealth quintile</b>                | Lowest            | 2361      | 27.86      |
|                                       | Second            | 1291      | 15.24      |
|                                       | Middle            | 1184      | 13.97      |
|                                       | Fourth            | 1158      | 13.67      |
|                                       | Highest           | 2479      | 29.26      |
| <b>Religion</b>                       | Orthodox          | 3243      | 38.27      |
|                                       | Protestant        | 1597      | 18.85      |
|                                       | Muslim            | 3474      | 41.00      |
|                                       | Other             | 159       | 1.88       |
| <b>Residence</b>                      | Urban             | 2261      | 26.68      |
|                                       | Rural             | 6212      | 73.32      |

## Women's obstetric characteristics

Amongst the 8,473 married women, 7,721 (91.12%) had given birth. The mean age at first childbirth was 18.98 (standard deviation of  $\pm 3.85$ ) years. Over 37% of married women had five or more births; about 31% of the women had more than four living children. Amongst 5,708 women who were pregnant in the previous five years, 1,853 (32.46%) had no antenatal care visits for their most recent pregnancy. With regard to healthcare decisions, only 19.40% of the women had autonomy to decide on their own healthcare needs. Under a third (31.24%) of women had been exposed to family planning messages. More than half (52.79%) of married women had ever used contraceptive methods (Table 2).

Table 2: Obstetric characteristics of married women in Ethiopia, 2016 (N = 8,473)

| Variable                                               |                        | Frequency | Percentage |
|--------------------------------------------------------|------------------------|-----------|------------|
| Parity                                                 | 0                      | 752       | 8.88       |
|                                                        | 1 – 4                  | 4577      | 54.02      |
|                                                        | >= 5                   | 3144      | 37.11      |
| Number of living children                              | 0                      | 813       | 9.60       |
|                                                        | 1 – 4                  | 5029      | 59.35      |
|                                                        | >= 5                   | 2631      | 31.05      |
| Age at first childbirth (n = 7721)                     | <= 19 year             | 5618      | 66.30      |
|                                                        | 20 – 24 year           | 2224      | 26.25      |
|                                                        | >= 25 year             | 631       | 7.45       |
| Number of ANC visits (n = 5708)                        | 0                      | 1853      | 32.46      |
|                                                        | 1 – 3                  | 1688      | 29.57      |
|                                                        | >=4                    | 2167      | 37.96      |
| Autonomy in own personal healthcare decision making    | Respondent alone       | 1644      | 19.40      |
|                                                        | Joint decision         | 5298      | 62.53      |
|                                                        | Husband/partner alone  | 1531      | 18.07      |
| Autonomy in family planning decision making (n = 2954) | Mainly respondent      | 724       | 24.51      |
|                                                        | Mainly husband/partner | 149       | 5.04       |
|                                                        | Joint decision         | 2081      | 70.45      |
| Knowledge of modern contraceptive methods              | No                     | 324       | 3.82       |
|                                                        | Yes                    | 8149      | 96.18      |
| Exposure to family planning messages                   | No                     | 5826      | 68.76      |
|                                                        | Yes                    | 2647      | 31.24      |
| Ever used any contraceptive method                     | No                     | 4000      | 47.21      |
|                                                        | Yes                    | 4473      | 52.79      |

## Health facility characteristics

Data were collected from 1,165 health facilities nationwide. Amongst these health facilities, 18.73% and 27.75% were hospitals and health centres, respectively. About 68% of the health facilities were managed by the government. With regard to family planning service provision, 1,020 (87.55%) of the health facilities provided family planning services. Three quarters (75.2%) had a contraceptive method mix; they provided three or more contraceptive methods. About 50% of the health facilities provided long-acting contraceptives, while, 99.31% of them provided short-term contraceptive methods. The national average distance from family planning health facilities to the 2016 EDHS clusters was 6.35 kilometres. The 2016 EDHS sampled clusters in the Somali region were the longest distance (18.58 km) from family planning facilities. Conversely, EDHS clusters in Addis Ababa were 0.55 km from family planning facilities (Table 3).

Table 3: The average distance from sampled family planning providing health facilities to demographic and health survey clusters in Ethiopia, 2016 (N = 1,020)

| Region            | Health facility type |                         |                       |                          | Average distance (km) |
|-------------------|----------------------|-------------------------|-----------------------|--------------------------|-----------------------|
|                   | Hospitals<br>n (%)   | Health Centres<br>n (%) | Health Posts<br>n (%) | Private Clinics<br>n (%) |                       |
| Tigray            | 30 (28.30)           | 30 (28.30)              | 25 (23.58)            | 21 (19.81)               | 5.53                  |
| Afar              | 6 (10.71)            | 25 (44.64)              | 16 (28.57)            | 9 (16.07)                | 9.69                  |
| Amhara            | 26 (16.77)           | 46 (29.68)              | 34 (21.94)            | 49 (31.61)               | 8.47                  |
| Oromia            | 49 (25.26)           | 50 (25.77)              | 43 (22.16)            | 52 (26.80)               | 8.99                  |
| Somali            | 10 (20.41)           | 21 (42.86)              | 12 (24.49)            | 6 (12.24)                | 18.58                 |
| Benishangul-Gumuz | 2 (3.13)             | 16 (25.00)              | 29 (45.31)            | 17 (26.56)               | 5.28                  |
| SNNPR             | 24 (15.58)           | 40 (25.97)              | 38 (24.68)            | 52 (33.77)               | 7.08                  |
| Gambela           | 1 (1.79)             | 14 (25.00)              | 22 (39.29)            | 19 (33.93)               | 4.32                  |
| Harari            | 4 (9.30)             | 8 (18.60)               | 21 (48.84)            | 10 (23.26)               | 0.73                  |
| Addis Ababa       | 33 (42.31)           | 18 (23.08)              | 0                     | 27 (34.62)               | 0.55                  |
| Dire Dawa         | 6 (9.23)             | 15 (23.08)              | 31 (47.69)            | 13 (20.00)               | 0.60                  |
| <b>Total</b>      | <b>191 (18.73)</b>   | <b>283 (27.75)</b>      | <b>271 (26.57)</b>    | <b>275 (26.96)</b>       | <b>6.35</b>           |



## **The modern contraceptive prevalence rate**

The prevalence of modern contraceptive use among married women was found to be 33.54% (urban 46.09%, 28.98% rural). Utilization of modern contraceptives varied across the different regions and city administrations; the highest modern contraceptive prevalence rate (mCPR) was reported in the Amhara region (51.65%), followed by Addis Ababa (50.08%) and the Southern Nations, Nationalities and Peoples Region (SNNPR) (45.48%). The map (Fig 1) shows the regional variations in modern contraceptive prevalence rates.

## **Spatial epidemiology of modern contraceptive use**

There is strong evidence to support spatial clustering in utilization of modern contraceptives among married women in Ethiopia (Global Moran's  $I = 0.24$ ,  $z$ -score = 8.09,  $P$ -value < 0.0001). Most of the hot spot areas (high contraceptive prevalence rates) were located in Addis Ababa and Amhara, followed by the Oromia region and the SNNPR. Conversely, the majority of the cold spot areas (low contraceptive prevalence rates) were located in Somali, Afar and Gambela regions followed by Tigray and Benishangul-Gumuz. This clustering was supported by the Getis-Ord  $G_i^*$  statistic when conducting the spatial analysis (Fig 2).

## **Determinants of modern contraceptive use among married women**

The calculated intra-class correlation coefficient (ICC) was 24.47%. This indicated that about 24% of the variability in using modern contraceptive methods was accounted for by location, leaving 76% of the variability to be accounted for by the differing characteristics of the women, or other unmeasured factors. The probability of using modern contraceptive methods in a typical region was estimated at 27.8%.

Women's age, husbands' / partners' education, household wealth, number of living children a woman had, and exposure to family planning messages were strong individual-level predictors of modern contraceptive use among married women. Women who were in the age groups of 35 – 39 (44%), 40 – 44 (55%) and 45 – 49 (82%) were less likely to use modern contraceptives compared to those in the 15 – 19 year age group. A woman whose husband attained a primary level of education was 54% more likely to use modern contraceptives as compared to those whose husband had no education. The odds ratio of modern contraceptive use increased with increasing wealth quintile. Therefore, women who were in the highest quintile were 5.26 times more likely to use the service as compared to those in the lowest quintile. Women who had been exposed to family planning messages were 68% more likely to use modern contraceptives relative to their counterparts with no exposure to family planning messages. Similarly, women

1  
2  
3 who had one to four children were 2.31 times more likely to use the service as compared to  
4 those having no child (Table 4).  
5  
6

7 At the regional level (level 2), only one variable was significantly associated with the use of  
8 modern contraceptives. A one-unit increase in the mean score of a health facility's readiness to  
9 provide short-term modern contraceptives in a typical region was associated with a 20 fold  
10 increase in the odds of modern contraceptive use (Table 4).  
11  
12  
13

14 Finally, the majority of the between region variance was explained by this model: the between  
15 region variation in using a modern contraceptive decreased from 1.07 to 0.18, which is an  
16 83.18% reduction in the unexplained variance between region modern contraceptive  
17 utilization. However, region level random effects are significant; the intra-class correlation is  
18 still 5%. This indicated that even after controlling for individual and regional level factors,  
19 there is still a considerable region level clustering of modern contraceptive use. The between  
20 region variance of slopes indicated that the following five variables varied significantly across  
21 regions: women's age, husbands' / partners' education, household wealth, number of living  
22 children and exposure to family planning messages (Table 4).  
23  
24  
25  
26  
27  
28  
29  
30  
31  
32  
33  
34  
35  
36  
37  
38  
39  
40  
41  
42  
43  
44  
45  
46  
47  
48  
49  
50  
51  
52  
53  
54  
55  
56  
57  
58  
59  
60

Table 4: Factors associated with utilization of modern contraceptive among married women in Ethiopia (N = 8,473)

| Predictors                                      |                                   | N    | Adjusted odds ratio (95% CI)    |
|-------------------------------------------------|-----------------------------------|------|---------------------------------|
| <b>Level-1 predictor variables</b>              |                                   |      | <b>Modern contraceptive use</b> |
| Age in years                                    | 15 – 19                           | 534  | 1                               |
|                                                 | 20 – 24                           | 1436 | 1.26 (0.91, 1.76)               |
|                                                 | 25 – 29                           | 1876 | 0.93 (0.67, 1.30)               |
|                                                 | 30 – 34                           | 1591 | 0.74 (0.52, 1.04)               |
|                                                 | 35 – 39                           | 1412 | <b>0.56 (0.39, 0.80)</b>        |
|                                                 | 40 – 44                           | 953  | <b>0.45 (0.31, 0.65)</b>        |
| Husbands' or partners' education                | 45 – 49                           | 671  | <b>0.18 (0.12, 0.27)</b>        |
|                                                 | No education                      | 3774 | 1                               |
|                                                 | Primary                           | 2651 | <b>1.54 (1.18, 2.02)</b>        |
|                                                 | Secondary                         | 1060 | 1.29 (0.96, 1.73)               |
| Wealth quintile                                 | Higher                            | 988  | 1.05 (0.77, 1.44)               |
|                                                 | Lowest                            | 2361 | 1                               |
|                                                 | Second                            | 1291 | <b>1.95 (1.27, 2.99)</b>        |
|                                                 | Middle                            | 1184 | <b>2.65 (1.72, 4.08)</b>        |
|                                                 | Fourth                            | 1158 | <b>3.42 (2.21, 5.28)</b>        |
| Number of living children                       | Highest                           | 2479 | <b>5.26 (3.46, 7.99)</b>        |
|                                                 | 0                                 | 813  | 1                               |
|                                                 | 1 – 4                             | 5029 | <b>2.31 (1.64, 3.25)</b>        |
| Exposure to family planning messages            | >= 5                              | 2631 | <b>2.05 (1.40, 3.01)</b>        |
|                                                 | No                                | 5826 | 1                               |
|                                                 | Yes                               | 2647 | <b>1.68 (1.20, 2.36)</b>        |
| <b>Level-2 predictor variables</b>              |                                   |      |                                 |
| General service readiness                       | Health facility management system |      | 1.27 (0.05, 35.69)              |
|                                                 | Health facility infrastructure    |      | 1.51 (0.18, 12.95)              |
| Family planning service availability            | Long-acting contraceptive methods |      | 5.04 (0.19, 136.21)             |
|                                                 | Short-term contraceptive methods  |      | 1.79 (0.03, 103.48)             |
| Family planning service readiness               | Long-acting contraceptives        |      | 0.43 (0.01, 17.12)              |
|                                                 | Short-term contraceptives         |      | <b>20.49 (1.44, 292.54)</b>     |
| Average distance to the nearest health facility |                                   |      | 1.02 (0.81, 1.28)               |
| <b>Random effects (Error variance)</b>          |                                   |      |                                 |
| Var (Age)                                       |                                   |      | <b>0.05 (0.02, 0.15)</b>        |
| Var (Husbands' or partners' education)          |                                   |      | <b>0.05 (0.02, 0.22)</b>        |
| Var (Wealth quintile)                           |                                   |      | <b>0.14 (0.07, 0.32)</b>        |
| Var (Number of living children)                 |                                   |      | <b>0.08 (0.04, 0.29)</b>        |
| Var (Exposure to family planning messages)      |                                   |      | <b>0.09 (0.03, 0.61)</b>        |
| Var (constant) - level-2 variance               |                                   |      | 0.18 (0.05, 3.70)               |
| Rho – Intra-class correlation                   |                                   |      | 0.05                            |
| Fit statistics (-2 Log Likelihood)              |                                   |      | 8860.49                         |

## Discussion

In Ethiopia, the use of modern contraception varied by region. This is the first study to specifically identify hot spots and model the use of modern contraception using nationwide population and health facility data. Approximately 34% of married women use modern contraceptives; the highest mCPR was reported among urban married women (46.09% versus 28.98%). This is comparable with the findings of the 2011 EDHS data analysis where 27.3% of married women reported using modern contraceptive methods; the highest proportion of them was from urban areas (49.55% versus 22.5%) (9). There are also variations in modern contraceptive rate across different regions in the country. The highest contraceptive rate, more than 50% mCPR, was reported in the Amhara region and the Addis Ababa city administration. Conversely, the lowest, below 10% mCPR, was reported in the Somali and Afar regions. Even though there has been an increase in modern contraceptive use all over the country, it was found that there was significant regional variation in modern contraceptive use.

High mCPR spots (hot spots) were detected in the Amhara region and in Addis Ababa, followed by the Southern Nations, Nationalities and Peoples Region, and some parts of Oromia region. Conversely, the majority of low mCPR (cold spots) were detected in the Somali, Afar and Gambela regions followed by Tigray and Benishangul-Gumuz. In 2011, hot spots of modern contraceptive use were observed in Addis Ababa, followed by some parts of Amhara, Oromia and SNNPR. The lowest contraceptive rates (cold spots) were observed in the Afar, Somali, and Gambela regions, and some parts of Tigray region (9). This indicated that the government is doing a good job in some of the regions, but is less successful in most regions. Due to this reason, the unmet need for modern contraception will be much higher than expected in most of those regions. Thus, cold spots (low rates of modern contraception) will be much more concentrated in those areas.

In Ethiopia, the use of modern contraceptives varied across the different regions and city administrations. The highest modern contraceptive prevalence rate was reported in the Amhara region, followed by Addis Ababa and SNNPR. This variation is demonstrated by the national demographic and health surveys conducted every five years since 2000. Over 16 years, between 2000 and 2016, Ethiopia showed a 28.7% (6.3 - 35.0%) increase in the utilization of modern contraceptives. Amongst the nine regions and two city administrations, the Amhara region showed a 40.4% (6.6 - 47%) increase in modern contraceptive use. This is the highest consistent increase in modern contraceptive use across the four EDHS surveys. Similarly, the Amhara

1  
2  
3 region showed a consistent decrease in the total fertility rate (5.9 – 3.7) over these years (8, 25-  
4 27). This consistent increase in the use of modern contraceptives and a consistent decrease in  
5 total fertility rate in the Amhara region might be attributable to the absence of 2.4 million  
6 Amharas in the 2007 Population Census (28, 29).  
7  
8  
9

10 Furthermore, the SNNPR is the second top region with a 35% increase in the use of modern  
11 contraceptives (5 - 40%) and a 1.5 decrease in total fertility rate (5.9 – 4.4). Even though Addis  
12 Ababa has the highest modern contraceptive prevalence rate, it did not show a consistent  
13 increase in the use of modern contraceptives across the four EDHS surveys (8, 25-27). In  
14 Addis Ababa, between 2000 and 2011, there was a 22% increase in modern contraceptive use  
15 (34.3% - 56.3%); however, this figure decreased to 50% in 2016. Conversely, the Afar and  
16 Somali regions had the lowest use of modern contraceptives in the 2000 to 2016 time period  
17 (8, 25-27). The large increase in the use of modern contraceptives in the Amhara region, as  
18 well as SNNPR, might be related to the high number of family planning organizations and the  
19 government's focus on these regions.  
20  
21  
22  
23  
24  
25  
26  
27

28 Different individual and regional level factors were significantly associated with the use of  
29 modern contraceptives. Health facilities' readiness to provide short-term modern  
30 contraceptives was the only regional level (level-2) variable that was significantly associated  
31 with the use of modern contraceptives. It was found that a one-unit increase in the mean score  
32 of health facilities' readiness to provide short-term modern contraceptives was significantly  
33 associated with utilization of modern contraceptives. In a study which used DHS and SPA data  
34 from several East African countries (Kenya, Uganda, Rwanda and Tanzania), it was found that  
35 modern contraceptive utilization was strongly associated with health facilities offering a wide  
36 range of contraceptives, and with a higher score of family planning service environment (16).  
37 Even though it is not directly related, in a study carried out in rural Ethiopia researchers found  
38 that women who live close to a health facility providing a wide range of contraceptives were  
39 more likely to use modern contraceptives (11). This indicated that the potential impact of  
40 family planning services should not be underestimated. Therefore, family planning health  
41 facilities should be fully equipped to provide a wide range of modern contraception.  
42  
43  
44  
45  
46  
47  
48  
49  
50  
51  
52

53 Amongst the individual-level factors, an increase in the age of women was significantly  
54 associated with a decrease in the use of modern contraceptives. This is similar to the results of  
55 other studies carried out in Ethiopia where the utilization of modern contraceptives was  
56 negatively influenced by an increase in the age of women (9, 11, 12). This could be related to  
57  
58  
59  
60

1  
2  
3 the knowledge gap, beliefs and/or attitudes that each woman had; as the age of woman increases  
4 the probability of changing women's attitudes or beliefs towards contraception might  
5 sometimes be difficult.  
6  
7

8  
9 In Ethiopia, among the individual-level variables, husbands'/partners' level of educational  
10 attainment was a significant predictor of the increase in modern contraceptive use. In a study  
11 conducted in the North Gondar, Amhara region of Ethiopia, it was found that the level of the  
12 husband's education was a significant predictor of contraceptive use (30). This might be due  
13 to the involvement of husbands in contraception decision making. This is supported by other  
14 studies demonstrating the influence of discussing modern contraceptives with the husband and  
15 the husband's approval of using modern contraceptives (31, 32). It was found that the  
16 utilization of modern contraceptives was significantly higher among those women whose  
17 husbands had approved of using modern contraceptives. Similarly, the odds of using modern  
18 contraceptives was higher among those women who had discussed modern contraceptives with  
19 their husbands (31, 32). This indicated that husband's education, as well as male involvement,  
20 has an important role in the use of modern contraceptives. Thus, educational opportunities for  
21 men and increasing male involvement in every family planning service should be emphasized  
22 for higher engagement in the use of modern contraception.  
23  
24  
25  
26  
27  
28  
29  
30  
31  
32

33  
34 The increase in household wealth was a significant predictor of an increase in modern  
35 contraceptive utilization. In two studies conducted in Ethiopia, including a study done among  
36 rural women (11), it was found that women who were in the fourth and highest quintile were  
37 more likely to use modern contraceptives (9, 11). Furthermore, family monthly income was  
38 significantly associated with the use of modern contraceptives (31). In Ethiopia, despite family  
39 planning services being free of charge in public health facilities, the cost of transport might be  
40 attributable to the use of modern contraception. Moreover, the costs of family planning services  
41 in private health facilities might also be related to the use of modern contraceptives. Thus,  
42 issues of the cost of transport and family planning service fees in private health facilities might  
43 not be important for wealthy families.  
44  
45  
46  
47  
48  
49  
50

51  
52 In this current study, it was found that, as compared to those who have no children, having one  
53 or more living children increases women's likelihood of using modern contraceptives. In the  
54 2011 EDHS data analysis (9) and a study done in the SNNPR (12), researchers also found that  
55 an increase in the number of living children was significantly associated with an increase in  
56 modern contraceptive utilization. Furthermore, among rural women in Ethiopia, an increase in  
57  
58  
59  
60

1  
2  
3 parity was positively associated with an increase in modern contraceptive use (11). This finding  
4 is similar to other studies done in Bangladesh, Pakistan and Tanzania where it was reported  
5 that an increase in the number of living children was significantly associated with an increase  
6 in the use of modern contraceptives (13, 33, 34). This indicated that women's fertility desires  
7 might influence their contraceptive use behaviour. Thus, women with a high number of living  
8 children might satisfy their fertility desire and continue using contraception.  
9

10  
11  
12  
13  
14 Exposure to family planning messages, the last individual-level variable in the multilevel  
15 model, showed an increase in the likelihood of using modern contraception. In a study done  
16 among reproductive-age women in SNNPR region, it was found that the odds of modern  
17 contraceptive utilization were significantly associated with women's overall knowledge of  
18 family planning methods. It was observed that women with good family planning knowledge  
19 were more likely to use modern contraceptives (12). Thus, exposure to family planning  
20 messages through different public and private media outlets is an important recommendation  
21 to arise from this study.  
22  
23  
24  
25  
26  
27  
28

29  
30 In this study, it was found that the utilization of modern contraceptives varied across regions.  
31 The individual-level variables (age, husbands'/partners' education, wealth, number of living  
32 children and exposure to family planning messages) varied significantly across the regions. In  
33 a study carried out in rural Ethiopia, it was found that the use of modern contraceptives was  
34 significantly higher in the Amhara and SNNPR regions (11). This might be related to variations  
35 in the availability and accessibility of different family planning services across administrative  
36 regions of the country. In addition to the multilevel analysis, this study has identified the hot  
37 spot and cold spot areas to help the government in improving the provision of modern  
38 contraceptives, especially those areas with the low rates of modern contraception.  
39  
40  
41  
42  
43  
44  
45

46 This study identified both the demand and supply-side determinants of modern contraceptive  
47 utilization using a linked population and health facility data. This was overlooked in previous  
48 studies where they mainly studied these factors separately. In addition to multilevel analysis,  
49 this study used spatial analyses to identify geographical variations of modern contraceptive  
50 utilization. Geographically looking family planning use is very important for effective resource  
51 allocation and intervention, informed decision making, and monitoring and evaluation  
52 purposes.  
53  
54  
55  
56  
57  
58  
59  
60

1  
2  
3 This study had several methodological limitations. However, most of these limitations were  
4 minimized (17). The exclusion of DHS clusters without latitudes and longitudes, and using  
5 sampled health facilities might under or overestimate our study finding. This study did not  
6 consider sampling weights while running the multilevel analysis. DHS surveys provide an  
7 average weight (hv005 or v005); however, the GLIMMIX procedure in SAS requires weights  
8 at each level. Due to this issue, we could not able to apply sampling weights in the multilevel  
9 analysis.  
10  
11  
12  
13  
14  
15

## 16 **Conclusion**

17  
18 In this study, it was found that more than a third of married women in Ethiopia use modern  
19 contraceptives. It was also found that different individual-level variables, as well as regional  
20 level variables, were predictors of modern contraceptive use. Furthermore, there is evidence of  
21 a wide geographical variation in the use of modern contraceptives across the country. The  
22 findings of this study have several implications: first, regions with low contraceptive rates and  
23 high fertility rates should be targeted for scaling up and tailoring of services to the lifestyles of  
24 the population of those regions. Second, the available and newly constructed health facilities  
25 should be equipped to provide modern contraceptive methods. Third, increasing educational  
26 opportunities for men and increasing male involvement, and exposure to family planning  
27 messages are also important recommendations to arise from this research. The importance of  
28 awareness and the potential impact of services cannot be underestimated.  
29  
30  
31  
32  
33  
34  
35  
36  
37  
38  
39  
40  
41  
42  
43  
44  
45  
46  
47  
48  
49  
50  
51  
52  
53  
54  
55  
56  
57  
58  
59  
60



## Abbreviations

|       |                                                    |
|-------|----------------------------------------------------|
| CRS   | Coordinate Reference System                        |
| DHS   | Demographic and Health Survey                      |
| EAs   | Enumeration Areas                                  |
| EDHS  | Ethiopia Demographic and Health Survey             |
| ESPA+ | Ethiopia Service Provision Assessment Plus         |
| FDR   | False Discovery Rate                               |
| GIS   | Geographic Information Systems                     |
| HGLM  | Hierarchical Generalized Linear Model              |
| ICC   | Intra-class Correlation Coefficient                |
| IUD   | Intrauterine Device                                |
| mCPR  | modern Contraceptive Prevalence Rate               |
| SNNPR | Southern Nations, Nationalities and Peoples Region |
| SPA   | Service Provision Assessment                       |
| WGS84 | World Geodetic System 84                           |

## Ethics approval

Ethical approval was obtained from the Human Research Ethics Committee, The University of Newcastle on March 20, 2018 with a reference number H-2018-0066. We also got the Ethiopian Public Health Institute (EPHI) and the Measure DHS program approval to access the datasets.

## Consent for publication

Not applicable.

## Availability of data and material

Not applicable.

## Competing interests

The authors declared that they have no competing interests.

## Funding

Not applicable.

## Authors' contributions

TKT, CC, RS, DL conceptualized the design of the analysis. TKT developed and drafted the manuscript. CC, PF, TG, RS and DL participated in critically revising the intellectual contents of the manuscript. All authors read, provided feedback and approved the final manuscript.

## Acknowledgements

We thank the University of Newcastle, Australia for offering free access to the digital online library to search the electronic databases that were considered for this analysis. We also thank the Measure DHS Program and the Ethiopian Public Health Institute for providing free access to the data sets used for this analysis.

## References

1. World Bank. World Development Indicators. Washington, DC: World Bank; 2009.
2. Darroch JE, Singh S, Nadeau J. Contraception: an investment in lives, health and development. Issues in brief (Alan Guttmacher Institute). 2008(5):1-4.
3. Cleland J, Bernstein S, Ezeh A, Faundes A, Glasier A, Innis J. Family planning: the unfinished agenda. *The Lancet*. 2006;368(9549):1810-27.
4. Tsui AO, McDonald-Mosley R, Burke AE. Family planning and the burden of unintended pregnancies. *Epidemiologic reviews*. 2010;32(1):152-74.
5. Stover J, Winfrey W. The effects of family planning and other factors on fertility, abortion, miscarriage, and stillbirths in the Spectrum model. *BMC Public Health*. 2017;17(4):775.
6. Bearak J, Popinchalk A, Alkema L, Sedgh G. Global, regional, and subregional trends in unintended pregnancy and its outcomes from 1990 to 2014: estimates from a Bayesian hierarchical model. *Lancet Glob Health*. 2018;6(4):e380-e9.
7. Ba DM, Ssentongo P, Agbese E, Kjerulff KH. Prevalence and Predictors of contraceptive use among women of reproductive age in 17 sub-Saharan African countries: A large population-based study. *Sexual & Reproductive Healthcare*. 2019.
8. Central Statistical Agency (CSA) [Ethiopia], ICF. Ethiopia Demographic and Health Survey 2016. Addis Ababa, Ethiopia, and Rockville, Maryland, USA: CSA and ICF; 2016.
9. Lakew Y, Reda AA, Tamene H, Benedict S, Deribe K. Geographical variation and factors influencing modern contraceptive use among married women in Ethiopia: evidence from a national population based survey. *Reprod Health*. 2013;10(1):52.
10. Mandiwa C, Namondwe B, Makwinja A, Zamawe C. Factors associated with contraceptive use among young women in Malawi: analysis of the 2015–16 Malawi demographic and health survey data. *Contraception and Reproductive Medicine*. 2018;3(1):12.
11. Shiferaw S, Spigt M, Seme A, Amogne A, Skrøvseth S, Desta S, et al. Does proximity of women to facilities with better choice of contraceptives affect their contraceptive utilization in rural Ethiopia? *PLoS ONE*. 2017;12(11):e0187311.
12. Endriyas M, Eshete A, Mekonnen E, Misganaw T, Shiferaw M, Ayele S. Contraceptive utilization and associated factors among women of reproductive age group in Southern

- 1  
2  
3 Nations Nationalities and Peoples' Region, Ethiopia: cross-sectional survey, mixed-  
4 methods. *Contraception and reproductive medicine*. 2017;2(1):10.  
5  
6 13. Stephenson R, Hennink M. Barriers to family planning service use among the urban poor  
7 in Pakistan. *Asia-Pacific Population Journal*. 2004;19(2):5-26.  
8  
9 14. Hong R, Montana L, Mishra V. Family planning services quality as a determinant of use  
10 of IUD in Egypt. *BMC Health Serv Res*. 2006;6(1):79.  
11  
12 15. Rose M, Abderrahim N, Stanton C, Helsel D. Maternity Care: A Comparative Report on  
13 the Availability and Use of Maternity Services. Data from the Demographic and Health  
14 Surveys Women's Module & Services Availability Module 1993-1996.  
15 MEASURE Evaluation Technical Report Series No. 9. Carolina Population Center,  
16 University of North Carolina at Chapel Hill; 2001.  
17  
18 16. Wang W, Wang S, Pullum T, Ametepi P. How family planning supply and the service  
19 environment affect contraceptive use: Findings from four East African countries. *DHS*  
20 *Analytical Studies No. 26*. Calverton, Maryland, USA: ICF International; 2012.  
21  
22 17. Tegegne TK, Chojenta C, Getachew T, Smith R, Loxton D. Service environment link and  
23 false discovery rate correction: Methodological considerations in population and health  
24 facility surveys. *PLoS ONE*. 2019;14(7):e0219860.  
25  
26 18. Burgert C, Zachary B. Incorporating geographic information into Demographic and  
27 Health Surveys: a field guide to GPS data collection. 2011.  
28  
29 19. Ethiopian Public Health Institute, ICF International. Ethiopia Service Provision  
30 Assessment Plus (ESPA+) Survey 2014. Addis Ababa, Ethiopia and Rockville, Maryland  
31 USA: Ethiopian Public Health Institute and ICF International; 2014.  
32  
33 20. Natural Earth. Free vector and raster map data [cited 31/05/2019. Available from:  
34 <https://www.naturalearthdata.com/downloads/10m-cultural-vectors/>.  
35  
36 21. Ene M, Leighton EA, Blue GL, Bell BA, editors. Multilevel models for categorical data  
37 using SAS® PROC GLIMMIX: The basics. *SAS Global Forum 2015 Proceedings*; 2015.  
38  
39 22. Tom A, Bosker TASRJ, Bosker RJ. Multilevel analysis: an introduction to basic and  
40 advanced multilevel modeling: Sage; 1999.  
41  
42 23. Anselin L. Local indicators of spatial association—LISA. *Geographical analysis*.  
43 1995;27(2):93-115.  
44  
45 24. Caldas de Castro M, Singer BH. Controlling the false discovery rate: a new application to  
46 account for multiple and dependent tests in local statistics of spatial association.  
47 *Geographical Analysis*. 2006;38(2):180-208.  
48  
49 25. Central Statistical Authority [Ethiopia], Macro O. Ethiopia Demographic and Health  
50 Survey 2000. Addis Ababa, Ethiopia and Calverton, Maryland, USA: Central Statistical  
51 Authority and ORC Macro.; 2001.  
52  
53 26. Central Statistical Agency [Ethiopia], ORC Macro. Ethiopia Demographic and Health  
54 Survey 2005. Addis Ababa, Ethiopia and Calverton, Maryland, USA: Central Statistical  
55 Agency and ORC Macro. ; 2006.  
56  
57 27. Central Statistical Agency [Ethiopia], ICF International. Ethiopia Demographic and  
58 Health Survey 2011. Addis Ababa, Ethiopia and Calverton, Maryland, USA: Central  
59 Statistical Agency and ICF International; 2012.  
60  
61 28. Ethiopia Central Statistical Authority. The 1994 population and housing census of  
62 Ethiopia. Results for Amhara Region: Volume II Analytical Report. Addis Ababa:  
63 Federal Democratic Republic of Ethiopia, Office of Housing and Population Census  
64 Commission, Central Statistical Authority; 1998.  
65  
66 29. United Nations Population Fund (UNFPA). Summary and statistical report of the 2007  
67 population and housing census: population size by age and sex. Addis Ababa: Federal  
68 Democratic Republic of Ethiopia, Office of Housing and Population Census Commission,  
69 Central Statistical Authority; 2008.

- 1
- 2
- 3
- 4 30. Kebede Y. Contraceptive prevalence in dembia district, northwest Ethiopia. *Ethiopian*
- 5 *Journal of health development*. 2006;20(1):32-8.
- 6 31. Mohammed A, Woldeyohannes D, Feleke A, Megabiaw B. Determinants of modern
- 7 contraceptive utilization among married women of reproductive age group in North Shoa
- 8 Zone, Amhara Region, Ethiopia. *Reprod Health*. 2014;11(1):13.
- 9 32. Abraham W, Adamu A, Deresse D. The involvement of men in family planning an
- 10 application of transtheoretical model in Wolaita Soddo Town South Ethiopia. *Asian*
- 11 *Journal of Medical Sciences*. 2010;2(2):44-50.
- 12 33. Mostafa Kamal S, Aynul Islam M. Contraceptive use: socioeconomic correlates and
- 13 method choices in rural Bangladesh. *Asia Pacific Journal of Public Health*.
- 14 2010;22(4):436-50.
- 15 34. Lwelamira J, Mnyamagola G, Msaki M. Knowledge, Attitude and Practice (KAP)
- 16 towards modern contraceptives among married women of reproductive age in Mpwapwa
- 17 District, Central Tanzania. *Current Research Journal of Social Sciences*. 2012;4(3):235-
- 18 45.
- 19
- 20
- 21
- 22
- 23
- 24

## 25 **Figure Legends**

26 Figure 1: Modern contraceptive use among married women in Ethiopia, 2016

27 Figure 2: Clusters of high and low modern contraceptive prevalence rates in Ethiopia, 2016

1  
2  
3  
4  
5  
6  
7  
8  
9  
10  
11  
12  
13  
14  
15  
16  
17  
18  
19  
20  
21  
22  
23  
24  
25  
26  
27  
28  
29  
30  
31  
32  
33  
34  
35  
36  
37  
38  
39  
40  
41  
42  
43  
44  
45  
46  
47  
48  
49  
50  
51  
52  
53  
54  
55  
56  
57  
58  
59  
60

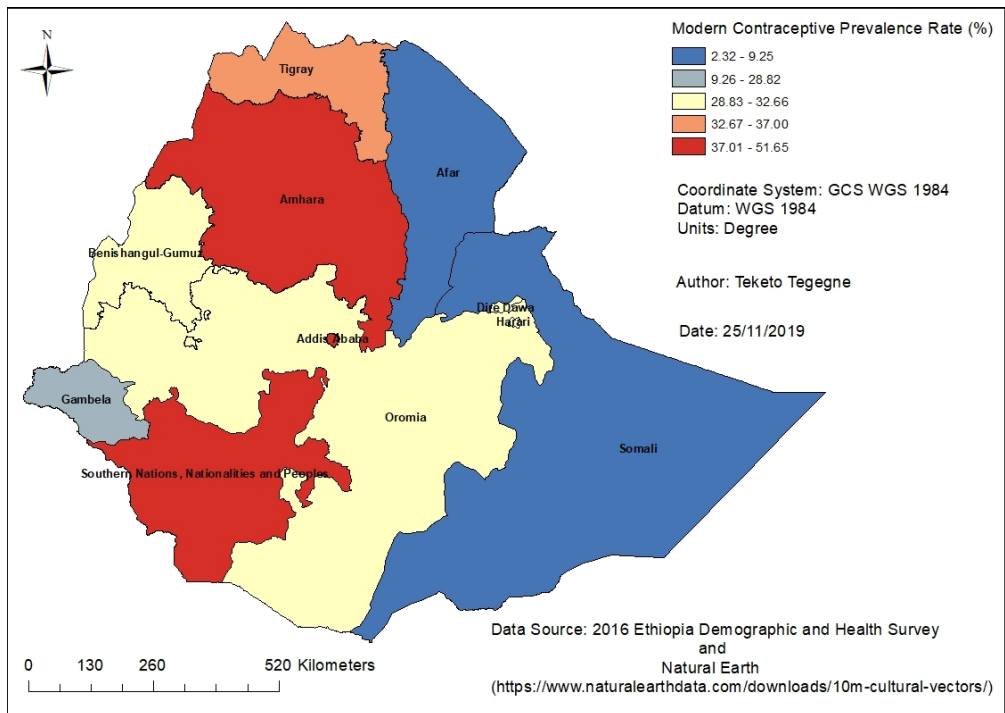

296x210mm (96 x 96 DPI)

1  
2  
3  
4  
5  
6  
7  
8  
9  
10  
11  
12  
13  
14  
15  
16  
17  
18  
19  
20  
21  
22  
23  
24  
25  
26  
27  
28  
29  
30  
31  
32  
33  
34  
35  
36  
37  
38  
39  
40  
41  
42  
43  
44  
45  
46  
47  
48  
49  
50  
51  
52  
53  
54  
55  
56  
57  
58  
59  
60

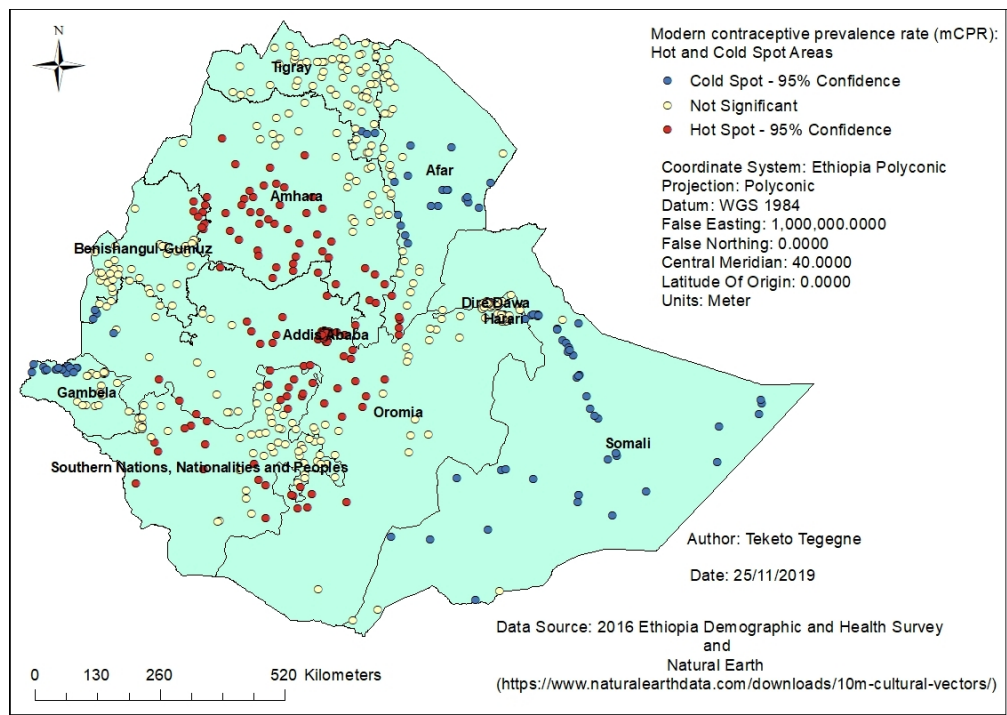

297x210mm (96 x 96 DPI)

STROBE Statement—Checklist of items that should be included in reports of *cross-sectional studies*

|                              | Item No | Recommendation                                                                                                                                                                                               | Page No |
|------------------------------|---------|--------------------------------------------------------------------------------------------------------------------------------------------------------------------------------------------------------------|---------|
| <b>Title and abstract</b>    | 1       | (a) Indicate the study's design with a commonly used term in the title or the abstract                                                                                                                       | 1       |
|                              |         | (b) Provide in the abstract an informative and balanced summary of what was done and what was found                                                                                                          | 2       |
| <b>Introduction</b>          |         |                                                                                                                                                                                                              |         |
| Background/rationale         | 2       | Explain the scientific background and rationale for the investigation being reported                                                                                                                         | 4 - 5   |
| Objectives                   | 3       | State specific objectives, including any prespecified hypotheses                                                                                                                                             | 5       |
| <b>Methods</b>               |         |                                                                                                                                                                                                              |         |
| Study design                 | 4       | Present key elements of study design early in the paper                                                                                                                                                      | 5       |
| Setting                      | 5       | Describe the setting, locations, and relevant dates, including periods of recruitment, exposure, follow-up, and data collection                                                                              | 5       |
| Participants                 | 6       | (a) Give the eligibility criteria, and the sources and methods of selection of participants                                                                                                                  | 5       |
| Variables                    | 7       | Clearly define all outcomes, exposures, predictors, potential confounders, and effect modifiers. Give diagnostic criteria, if applicable                                                                     | 6       |
| Data sources/<br>measurement | 8*      | For each variable of interest, give sources of data and details of methods of assessment (measurement). Describe comparability of assessment methods if there is more than one group                         | 5 - 6   |
| Bias                         | 9       | Describe any efforts to address potential sources of bias                                                                                                                                                    | 6       |
| Study size                   | 10      | Explain how the study size was arrived at                                                                                                                                                                    | 5       |
| Quantitative variables       | 11      | Explain how quantitative variables were handled in the analyses. If applicable, describe which groupings were chosen and why                                                                                 | 6       |
| Statistical methods          | 12      | (a) Describe all statistical methods, including those used to control for confounding                                                                                                                        | 7       |
|                              |         | (b) Describe any methods used to examine subgroups and interactions                                                                                                                                          | 7       |
|                              |         | (c) Explain how missing data were addressed                                                                                                                                                                  | 7       |
|                              |         | (d) If applicable, describe analytical methods taking account of sampling strategy                                                                                                                           |         |
|                              |         | (e) Describe any sensitivity analyses                                                                                                                                                                        |         |
| <b>Results</b>               |         |                                                                                                                                                                                                              |         |
| Participants                 | 13*     | (a) Report numbers of individuals at each stage of study—eg numbers potentially eligible, examined for eligibility, confirmed eligible, included in the study, completing follow-up, and analysed            | 8 - 13  |
|                              |         | (b) Give reasons for non-participation at each stage                                                                                                                                                         | 8 - 13  |
|                              |         | (c) Consider use of a flow diagram                                                                                                                                                                           | 8 - 13  |
| Descriptive data             | 14*     | (a) Give characteristics of study participants (eg demographic, clinical, social) and information on exposures and potential confounders                                                                     | 8 - 13  |
|                              |         | (b) Indicate number of participants with missing data for each variable of interest                                                                                                                          | 8 - 13  |
| Outcome data                 | 15*     | Report numbers of outcome events or summary measures                                                                                                                                                         | 14      |
| Main results                 | 16      | (a) Give unadjusted estimates and, if applicable, confounder-adjusted estimates and their precision (eg, 95% confidence interval). Make clear which confounders were adjusted for and why they were included | 14 - 16 |

|                          |    |                                                                                                                                                                            |         |
|--------------------------|----|----------------------------------------------------------------------------------------------------------------------------------------------------------------------------|---------|
|                          |    | (b) Report category boundaries when continuous variables were categorized                                                                                                  | 16      |
|                          |    | (c) If relevant, consider translating estimates of relative risk into absolute risk for a meaningful time period                                                           |         |
| Other analyses           | 17 | Report other analyses done—eg analyses of subgroups and interactions, and sensitivity analyses                                                                             | 14      |
| <b>Discussion</b>        |    |                                                                                                                                                                            |         |
| Key results              | 18 | Summarise key results with reference to study objectives                                                                                                                   | 17      |
| Limitations              | 19 | Discuss limitations of the study, taking into account sources of potential bias or imprecision. Discuss both direction and magnitude of any potential bias                 | 3, 21   |
| Interpretation           | 20 | Give a cautious overall interpretation of results considering objectives, limitations, multiplicity of analyses, results from similar studies, and other relevant evidence | 17 – 20 |
| Generalisability         | 21 | Discuss the generalisability (external validity) of the study results                                                                                                      | 21      |
| <b>Other information</b> |    |                                                                                                                                                                            |         |
| Funding                  | 22 | Give the source of funding and the role of the funders for the present study and, if applicable, for the original study on which the present article is based              | 22      |

\*Give information separately for exposed and unexposed groups.

**Note:** An Explanation and Elaboration article discusses each checklist item and gives methodological background and published examples of transparent reporting. The STROBE checklist is best used in conjunction with this article (freely available on the Web sites of PLoS Medicine at <http://www.plosmedicine.org/>, Annals of Internal Medicine at <http://www.annals.org/>, and Epidemiology at <http://www.epidem.com/>). Information on the STROBE Initiative is available at [www.strobe-statement.org](http://www.strobe-statement.org).



# BMJ Open

## Modern contraception in Ethiopia: a spatial and multilevel analyses to determine service readiness and factors associated with modern contraceptive use

|                                 |                                                                                                                                                                                                                                                                                                                                                                                                                                                                                                                                                                                                        |
|---------------------------------|--------------------------------------------------------------------------------------------------------------------------------------------------------------------------------------------------------------------------------------------------------------------------------------------------------------------------------------------------------------------------------------------------------------------------------------------------------------------------------------------------------------------------------------------------------------------------------------------------------|
| Journal:                        | <i>BMJ Open</i>                                                                                                                                                                                                                                                                                                                                                                                                                                                                                                                                                                                        |
| Manuscript ID                   | bmjopen-2020-037532.R1                                                                                                                                                                                                                                                                                                                                                                                                                                                                                                                                                                                 |
| Article Type:                   | Original research                                                                                                                                                                                                                                                                                                                                                                                                                                                                                                                                                                                      |
| Date Submitted by the Author:   | 25-May-2020                                                                                                                                                                                                                                                                                                                                                                                                                                                                                                                                                                                            |
| Complete List of Authors:       | Tegegne, Teketo; Debre Markos University, Public Health; The University of Newcastle, School of Medicine and Public Health<br>Chojenta, Catherine; The University of Newcastle, School of Medicine and Public Health<br>Forder, Peta; The University of Newcastle, School of Medicine and Public Health<br>Getachew, Theodros ; Ethiopian Public Health Institute, Health System and Reproductive Health Research Directorate<br>Smith, Roger; The University of Newcastle School of Medicine and Public Health,<br>Loxton, Deborah; The University of Newcastle, School of Medicine and Public Health |
| <b>Primary Subject Heading</b>: | Epidemiology                                                                                                                                                                                                                                                                                                                                                                                                                                                                                                                                                                                           |
| Secondary Subject Heading:      | Global health, Health services research, Sexual health                                                                                                                                                                                                                                                                                                                                                                                                                                                                                                                                                 |
| Keywords:                       | EPIDEMIOLOGY, PUBLIC HEALTH, REPRODUCTIVE MEDICINE, STATISTICS & RESEARCH METHODS                                                                                                                                                                                                                                                                                                                                                                                                                                                                                                                      |
|                                 |                                                                                                                                                                                                                                                                                                                                                                                                                                                                                                                                                                                                        |

SCHOLARONE™  
Manuscripts



I, the Submitting Author has the right to grant and does grant on behalf of all authors of the Work (as defined in the below author licence), an exclusive licence and/or a non-exclusive licence for contributions from authors who are: i) UK Crown employees; ii) where BMJ has agreed a CC-BY licence shall apply, and/or iii) in accordance with the terms applicable for US Federal Government officers or employees acting as part of their official duties; on a worldwide, perpetual, irrevocable, royalty-free basis to BMJ Publishing Group Ltd ("BMJ") its licensees and where the relevant Journal is co-owned by BMJ to the co-owners of the Journal, to publish the Work in this journal and any other BMJ products and to exploit all rights, as set out in our [licence](#).

The Submitting Author accepts and understands that any supply made under these terms is made by BMJ to the Submitting Author unless you are acting as an employee on behalf of your employer or a postgraduate student of an affiliated institution which is paying any applicable article publishing charge ("APC") for Open Access articles. Where the Submitting Author wishes to make the Work available on an Open Access basis (and intends to pay the relevant APC), the terms of reuse of such Open Access shall be governed by a Creative Commons licence – details of these licences and which [Creative Commons](#) licence will apply to this Work are set out in our licence referred to above.

Other than as permitted in any relevant BMJ Author's Self Archiving Policies, I confirm this Work has not been accepted for publication elsewhere, is not being considered for publication elsewhere and does not duplicate material already published. I confirm all authors consent to publication of this Work and authorise the granting of this licence.

1  
2  
3 **Modern contraception in Ethiopia: a spatial and multilevel analyses to**  
4 **determine service readiness and factors associated with modern**  
5 **contraceptive use**  
6  
7  
8  
9

10 Teketo Kassaw Tegegne <sup>1, 2, 4\*</sup>, Catherine Chojenta <sup>2</sup>, Peta Forder <sup>2</sup>, Theodros Getachew <sup>5</sup>,  
11 Roger Smith <sup>3</sup>, Deborah Loxton <sup>2</sup>  
12  
13

14  
15 <sup>1</sup> Department of Public Health, College of Health Sciences, Debre Markos University, Debre  
16 Markos, Ethiopia

17  
18 <sup>2</sup> Research Centre for Generational Health and Ageing, Hunter Medical Research Institute,  
19 School of Medicine and Public Health, University of Newcastle, Newcastle, New South Wales,  
20 Australia  
21  
22

23  
24 <sup>3</sup> Mothers and Babies Research Centre, Hunter Medical Research Institute, School of Medicine  
25 and Public Health, University of Newcastle, Newcastle, New South Wales, Australia  
26

27 <sup>4</sup> The Australian College of Health Informatics, Sydney, New South Wales, Australia  
28

29 <sup>5</sup> Health System and Reproductive Health Research Directorate, Ethiopian Public Health  
30 Institute, Addis Ababa, Ethiopia  
31  
32

33 **Email address:**

34  
35 TKT: [kteketo@yahoo.com](mailto:kteketo@yahoo.com) or [TeketoKassaw.Tegegne@uon.edu.au](mailto:TeketoKassaw.Tegegne@uon.edu.au)

36  
37 CC: [Catherine.Chojenta@newcastle.edu.au](mailto:Catherine.Chojenta@newcastle.edu.au)

38  
39 PF: [peta.forder@newcastle.edu.au](mailto:peta.forder@newcastle.edu.au)

40  
41 TG: [tedi.getachew@yahoo.com](mailto:tedi.getachew@yahoo.com)

42  
43 RS: [Roger.Smith@newcastle.edu.au](mailto:Roger.Smith@newcastle.edu.au)

44  
45 DL: [Deborah.Loxton@newcastle.edu.au](mailto:Deborah.Loxton@newcastle.edu.au)  
46

47 **\* Corresponding author**  
48  
49  
50  
51  
52  
53  
54  
55  
56  
57  
58  
59  
60

## Abstract

**Objective:** To assess spatial variations in modern contraceptive use and to identify factors associated with it among married women in Ethiopia.

**Design:** Cross-sectional analysis of population-based and health facility data.

**Setting:** Ethiopia Demographic and Health Survey data linked to Service Provision Assessment data.

**Population:** Eight thousand four hundred and seventy-three married women and 1020 facilities that reported providing family planning services.

**Methods:** A linked secondary data analysis of population and health facility data was carried out. Both multilevel and spatial analyses were conducted to identify key determinants of women's use of modern contraceptive and spatial clustering of modern contraceptive use.

**Main outcome measure:** Modern contraceptive use.

**Results:** About 24% of the variation in the use of modern contraception was accounted for by location. A one-unit increase in the mean score of health facilities' readiness to provide short-term modern contraceptives in a typical region was associated with a 20-fold increase in the odds of modern contraceptive use (Adjusted Odds Ratio [AOR] = 20.49, 95% CI 1.44 - 29.54). In the spatial analysis, it was found that Addis Ababa and the Amhara region had high clusters of modern contraceptive use rates. On the other hand, low rates of contraceptive use were clustered in the Afar and Somali regions.

**Conclusion:** There were significant variations in the use of modern contraceptives across the different regions of Ethiopia. Therefore, regions with low contraceptive rates and high fertility rates should be targeted for scaling up and tailoring of services to the culture and lifestyles of the population of those regions.

**Keywords:** Modern contraceptives, spatial variations, family planning methods

### Strengths and limitations of this study

- This study identified both the demand and supply-side determinants of modern contraceptive utilization using a linked population and health facility data.
- In addition to multilevel analysis, this study used spatial analyses to identify geographic variations of modern contraceptive utilization.
- This study excluded DHS clusters without geographic coordinates and used sampled health facilities that might under or overestimate the study finding.
- This study did not consider sampling weights while running the multilevel analysis.
- DHS surveys provide an average weight (hv005 or v005); however, the GLIMMIX procedure in SAS requires weights at each level that did not enable to apply sampling weights in the multilevel analysis.

## Introduction

Worldwide, modern contraceptives are important in fertility control (1). In developing countries, contraceptives have a clear effect on the health of women, children and families. For instance, contraceptives are estimated to prevent 2.7 million infant deaths and the loss of 60 million healthy lives a year worldwide (2). In countries with high fertility rates, promoting contraceptives averts 32% of all maternal deaths and approximately 10% of child mortality. Modern contraceptives also make a huge contribution to the achievement of universal primary schooling, female empowerment, and in reducing poverty and hunger (3). Family planning is also important in preventing unintended pregnancies and unsafe abortions (4, 5).

Despite its importance, access to and utilisation of modern contraceptives vary worldwide. Women in developed countries have better access to and use of contraceptives compared to women in developing countries (4). In a study from 2010–2014, it was reported that the global burden of unintended pregnancies was 44%; the rate of unintended pregnancies is substantially higher in developing countries compared to developed regions (6). Higher levels of unmet need for contraception could contribute to higher rates of unintended pregnancies in developing regions. For instance, in sub-Saharan Africa, the prevalence of contraceptive use among women of reproductive age is only 17% (7).

Similarly, the utilisation of modern contraceptives is a common healthcare challenge in Ethiopia. Even though there is an increase in women's use of modern contraceptives, challenges remain (8). Discrepancies in the use of modern contraceptives are common within the different parts of the country. For instance, the Somali region accounts for the lowest rate of modern contraceptive use (1.4%), compared to Addis Ababa (50.1%) (8).

The utilisation of modern contraceptives can be influenced by both demand- and supply-side factors. In previous studies, more emphasis has been given to the importance of demand-side factors (7). Most of the investigated demand-side factors were women's education (7, 9), age (9, 10), household wealth (7, 9, 11) and parity (12, 13). The importance of supply-side factors has been largely overlooked. In some studies, it was reported that the quality of family planning services (14) and living close to a family planning facility (15) were significantly associated with modern contraceptive utilisation. In East Africa, it was observed that the utilisation of

1  
2  
3 modern contraceptives was higher among facilities providing different contraceptive methods  
4 and with higher family planning service environment scores (16).  
5  
6  
7

8 Due to the increasing availability of geographically referenced health facility and population  
9 data, it is possible to do geographically linked analyses (17). This opportunity allows  
10 identification of the location of existing health facilities as well as mapping the eligible  
11 population without access to a particular health service, such as family planning. This further  
12 enables identification of both the demand- and supply-side factors and helps the government  
13 determine where future investments should be targeted.  
14  
15  
16  
17

18  
19 This study aimed to assess spatial variations in the use of modern contraceptives among  
20 married women in Ethiopia and identify the potential factors associated with the use of modern  
21 contraceptives among married women throughout the country, using the national population  
22 and health facility data. Contraception is more critical for women of reproductive age.  
23 However, married women or women in union are more likely to be sexually active as opposed  
24 to single, divorced or widowed women, particularly in Ethiopia where sex outside of a union  
25 is uncommon. Therefore, this study focused on only married women's modern contraceptive  
26 use.  
27  
28  
29  
30  
31  
32

## 33 **Methods**

### 34 **Data Sources**

35  
36 The main data sources of this study were the 2016 Ethiopia Demographic and Health Survey  
37 (EDHS) and the 2014 Ethiopian Service Provision Assessment Plus (ESPA+). Ethical approval  
38 was obtained from the DHS program Institutional Review Board and the Ethiopian Public  
39 Health Institute. Furthermore, this study was ethically approved by the Human Research Ethics  
40 Committee, The University of Newcastle on March 20, 2018 (approval number H-2018-0066).  
41  
42  
43  
44  
45  
46  
47

48 The 2016 EDHS collected information on population characteristics, such as contraception and  
49 obstetric care use. The survey details can be found elsewhere (8, 17). The geographic  
50 coordinates of each survey cluster were also collected (18). In the population survey, all women  
51 aged 15–49 years were eligible for individual interviews. The survey identified 16583 eligible  
52 women. Of these women, from 645 DHS clusters, 15683 were interviewed. In this analysis,  
53 8473 married women who were not pregnant at the time of the interview were included from  
54  
55  
56  
57  
58  
59  
60

622 DHS clusters. A total of 261 married, non-pregnant women from 23 clusters were excluded from the analysis since they had missing geographic coordinates.

The main source of the health facility data was the 2014 ESPA+ survey (19). The ESPA+ survey had information on service availability and readiness, including family planning services (19). Details of the survey can be found elsewhere (17, 19). The ESPA+ survey collected data from 1165 facilities. The survey used a combination of a census of hospitals and a sample of other health facilities (health centres, health posts and clinics). Of the 1165 facilities, 1020 facilities reported providing family planning services. In this analysis, 1020 facilities that reported providing family planning services were included.

### **Data Linking Method**

In this study, we used an administrative boundary link for linking health facility data with the population data (17). Details of this method can be found elsewhere (17). Ethiopia's administrative boundaries, used in this study, were obtained from Natural Earth (20).

### **Health Service Environment**

Four health service environment variable scores were created (average distance to the nearest family planning facility, family planning service availability, readiness to provide family planning services and general health facility readiness). All service availability and readiness scores were computed for the nearest family planning providing facilities. Details of this computation can be found elsewhere (17). Average straight-line distance to the nearest family planning providing facility was calculated after linking each DHS cluster with an ESPA+ survey facility (17). First, the distance from each cluster to every family planning providing facility within the administrative boundaries was calculated. Second, the nearest family planning providing facility was identified, and the average distance was computed per region.

In terms of the general service readiness score, eight general service readiness dimensions were obtained using principal component analysis (17). The average general service readiness score per region/city administration was computed using the SAS SCORE procedure. The first two principal components were used to compute two general service readiness scores (health facility management system and infrastructure). Further, indices of family planning availability and readiness were computed. Two family planning availability scores (long-acting and short-term contraceptive methods) were created using seven variables (17). Two family planning



1  
2  
3 readiness scores (readiness to provide long-acting and short-term contraceptives) were created  
4 using seven variables (17).  
5  
6  
7

## 8 **Outcome and Explanatory Variables**

### 9 **Explanatory Variables**

10 The explanatory variables of this study were sociodemographic and obstetric characteristics  
11 and health facility variables. The sociodemographic characteristics include age, education,  
12 occupation, husband/partner education and occupation, wealth, place of residence, and average  
13 distance to the nearest family planning facility. The obstetric characteristics were parity, the  
14 number of living children, ever use of modern contraception, and exposure to family planning  
15 messages. Further, the health facility variables were general service readiness, family planning  
16 service availability and family planning service readiness.  
17  
18  
19  
20  
21  
22  
23  
24

25 The occupational status of respondents was grouped into four categories: have no work,  
26 agricultural work, professional/technical/managerial work, and others. This was done based on  
27 the DHS occupation grouping. Respondents who responded not working at the time of the  
28 interview or did not work in the last 12 months before the survey were grouped as have no  
29 work. Professional/technical/managerial category constitutes teaching professionals, health  
30 professionals, business and administration professionals, legal and social workers, managers,  
31 etc. Agricultural categories also include fishermen, foresters and hunters. Other categories  
32 include daily laborers, street and related sales and service workers.  
33  
34  
35  
36  
37  
38  
39

40 Exposure to family planning messages was measured based on three DHS questions. The DHS  
41 collected data on woman's exposure to family planning messages whether the respondent has  
42 heard about family planning in the last few months (preceding the survey) from any of the  
43 following sources: a) heard family planning on the radio last months, b) heard family planning  
44 on TV last months and c) heard family planning from the newspaper last months. In this paper,  
45 exposure to the contraceptive message was measured if the respondent had exposure to one or  
46 more information sources.  
47  
48  
49  
50  
51  
52

### 53 **Outcome Variable**

54 The outcome variable of this study was modern contraceptive use. A woman was considered  
55 to be using modern contraception if she used any of the modern contraceptive methods other  
56  
57  
58  
59  
60

1  
2  
3 than male condoms (17). The male condom could be accessed from shops that the ESPA+  
4 survey did not capture.  
5  
6  
7

## 8 **Statistical Analysis**

### 9 **Multilevel Analysis**

10 To account for the nested nature of DHS data, a two-level generalised linear mixed model was  
11 used. This study had binary outcomes: whether a married woman used modern contraception  
12 or not. We were interested in the probability of modern contraceptive utilisation and the  
13 influence of individual and regional characteristics. The equation used to estimate the two-level  
14 hierarchical model can be found elsewhere (17).  
15  
16  
17  
18  
19

20  
21 Binary distribution with the logit link function was used to model this binary outcome. To  
22 estimate this model, the GLIMMIX procedure in SAS was used (21). Four model building  
23 processes were undertaken. The Laplace estimation was used for estimating these models. The  
24 model building process began with an empty model. The variance estimate from this model  
25 was used to calculate the intra-class correlation coefficient (ICC) (21). Details of calculating  
26 ICC in hierarchical generalised linear models can be found elsewhere (17, 22). By checking  
27 improvements in model fit, complex models were built step by step. The negative two log-  
28 likelihood (-2LL), Akaike Information Criteria (AIC) and Bayesian Information Criteria (BIC)  
29 were used to assess the best-fitting model (21).  
30  
31  
32  
33  
34  
35  
36  
37

### 38 **Spatial Analysis**

39 ArcGIS 10.6.1 was used to do spatial analyses. The Ethiopian Polyconic Projected Coordinate  
40 System (17) was used to flatten the Ethiopian map. Hot spot analysis was carried out to identify  
41 spatial clusters of modern contraceptive use. DHS clusters were the unit of spatial analyses.  
42  
43  
44  
45

46 We followed three analyses procedures while doing the hot spot analysis, as discussed  
47 elsewhere (17). First, we ran the Global Moran's I statistic, which is a global measure of spatial  
48 autocorrelation (23). Second, based on the Global Moran's I statistic, incremental spatial  
49 autocorrelation was run to determine the critical distance at which clustering of modern  
50 contraception prevalence rate (mCPR) peaked (165 km) (17). Last, the *Getis-Ord Gi\** statistic  
51 was run to identify statistically significant spatial clusters of mCPR (17). The two statistical  
52 problems of local statistics of spatial association (multiple comparison and spatial dependence)  
53 were controlled using an FDR correction (17, 24).  
54  
55  
56  
57  
58  
59  
60

## Patient and Public Involvement

This study used secondary data sets: 2016 EDHS and 2014 ESPA+ that were previously collected with confidentiality information maintained (no personal identifier used). The data were collected under the collaboration of The Ethiopian Federal Ministry of Health, Ethiopian Central Statistical Agency, Ethiopian Public Health Institute and USAID. Hence, as we did not collect the data directly from participants, no recruitment and contact of participants were required for this analysis.

## Results

### Sociodemographic Characteristics

The mean age of the study participants was 31.09 (standard deviation of  $\pm 8.22$ ) years. Regarding education, 57.46% of the women had no formal education, while 27.58% had primary level education. In terms of wealth, 29.26% of the women fell in the richest quintile and 27.86% were grouped in the poorest quintile. Regarding religion, 38.27% of respondents identified as Orthodox Christian and 41% as Muslim. Seventy-three percent of the respondents were from rural areas (see Table 1).

Table 1: Sociodemographic characteristics of married women in Ethiopia, 2016 (*N* = 8473)

|                                      | <b>Variable</b>                        | <b>Frequency</b> | <b>Percentage</b> |
|--------------------------------------|----------------------------------------|------------------|-------------------|
| Age                                  | 15–19                                  | 534              | 6.30              |
|                                      | 20–24                                  | 1436             | 16.95             |
|                                      | 25–29                                  | 1876             | 22.14             |
|                                      | 30–34                                  | 1591             | 18.78             |
|                                      | 35–39                                  | 1412             | 16.66             |
|                                      | 40–44                                  | 953              | 11.25             |
| Level of education                   | 45–49                                  | 671              | 7.92              |
|                                      | No education                           | 4869             | 57.46             |
|                                      | Primary                                | 2337             | 27.58             |
|                                      | Secondary                              | 773              | 9.12              |
| Occupation                           | Higher                                 | 494              | 5.83              |
|                                      | Have no work                           | 6030             | 71.17             |
|                                      | Professional/technical/managerial work | 1310             | 15.46             |
|                                      | Agricultural work                      | 749              | 8.84              |
| Husband/partner's level of education | Other                                  | 384              | 4.53              |
|                                      | No education                           | 3774             | 44.54             |
|                                      | Primary                                | 2651             | 31.29             |
|                                      | Secondary                              | 1060             | 12.51             |
| Husband/partner's occupation         | Higher                                 | 988              | 11.66             |
|                                      | Have no work                           | 851              | 10.04             |
|                                      | Professional/technical/managerial work | 2592             | 30.59             |
|                                      | Agricultural work                      | 4208             | 49.66             |
| Head of household                    | Other                                  | 822              | 9.70              |
|                                      | Someone else                           | 7147             | 84.35             |
| Family size                          | Herself                                | 1326             | 15.65             |
|                                      | 1–4                                    | 3050             | 36.00             |
|                                      | 5–8                                    | 4564             | 53.86             |
| Wealth quintile                      | ≥ 9                                    | 859              | 10.14             |
|                                      | Lowest                                 | 2361             | 27.86             |
|                                      | Second                                 | 1291             | 15.24             |
|                                      | Middle                                 | 1184             | 13.97             |
|                                      | Fourth                                 | 1158             | 13.67             |
| Religion                             | Highest                                | 2479             | 29.26             |
|                                      | Orthodox                               | 3243             | 38.27             |
|                                      | Protestant                             | 1597             | 18.85             |
|                                      | Muslim                                 | 3474             | 41.00             |
| Residence                            | Other                                  | 159              | 1.88              |
|                                      | Urban                                  | 2261             | 26.68             |
|                                      | Rural                                  | 6212             | 73.32             |

### Women's Obstetric Characteristics

Of the 8473 married women, 7721 (91.12%) had ever given birth. The mean age at first childbirth was 18.98 (standard deviation of  $\pm 3.85$ ) years. In terms of parity, 37.11% of married women had five or more births; 31.05% of the women had more than four living children. Among the 5708 women who were pregnant in the previous five years, 1853 (32.46%) had no ANC visits for their most recent pregnancy. There were 19.40% of women who reported they had the autonomy to decide on their own healthcare needs. Under one-third (31.24%) of women had been exposed to family planning messages. More than half (52.79%) of married women had ever used contraceptive methods. Of the 8473 married women, 5519 (65.14%) were not using any contraceptive methods at the time of the survey. Among these women, 1957 (35.46%) had a future intention to use contraception (see Table 2).

Table 2: Obstetric characteristics of married women in Ethiopia, 2016 ( $N = 8473$ )

|                                                                                | Variable                | Frequency | Percentage |
|--------------------------------------------------------------------------------|-------------------------|-----------|------------|
| Parity                                                                         | 0                       | 752       | 8.88       |
|                                                                                | 1–4                     | 4577      | 54.02      |
|                                                                                | $\geq 5$                | 3144      | 37.11      |
| Number of living children                                                      | 0                       | 813       | 9.60       |
|                                                                                | 1–4                     | 5029      | 59.35      |
|                                                                                | $\geq 5$                | 2631      | 31.05      |
| Age at first childbirth<br>( $n = 7721$ )                                      | $\leq 19$ years         | 5618      | 66.30      |
|                                                                                | 20–24 years             | 2224      | 26.25      |
|                                                                                | $\geq 25$ years         | 631       | 7.45       |
| Number of ANC visits<br>( $n = 5708$ )                                         | 0                       | 1853      | 32.46      |
|                                                                                | 1–3                     | 1688      | 29.57      |
|                                                                                | $\geq 4$                | 2167      | 37.96      |
| Autonomy in personal<br>healthcare decision-making                             | Respondent alone        | 1644      | 19.40      |
|                                                                                | Joint decision          | 5298      | 62.53      |
|                                                                                | Husband/partner alone   | 1531      | 18.07      |
| Autonomy in family<br>planning decision-making<br>( $n = 2954$ )               | Mainly respondent       | 724       | 24.51      |
|                                                                                | Mainly husband/partner  | 149       | 5.04       |
|                                                                                | Joint decision          | 2081      | 70.45      |
| Knowledge of modern<br>contraceptive methods                                   | No                      | 324       | 3.82       |
|                                                                                | Yes                     | 8149      | 96.18      |
| Exposure to family planning<br>messages                                        | No                      | 5826      | 68.76      |
|                                                                                | Yes                     | 2647      | 31.24      |
| Ever used any contraceptive<br>method                                          | No                      | 4000      | 47.21      |
|                                                                                | Yes                     | 4473      | 52.79      |
| Non-users' future intention<br>to use a contraceptive<br>method ( $n = 5519$ ) | Intends to use later    | 1957      | 35.46      |
|                                                                                | Unsure about future use | 90        | 1.63       |
|                                                                                | Does not intend to use  | 3472      | 62.91      |

### Health Facility Characteristics

Data were collected from 1165 health facilities nationwide. Among them, 18.73% were hospitals and 27.75% were health centres. Regarding health facility managing body, 68.43% of the health facilities were managed by the government. Of the facilities, 1020 (87.55%) provided family planning services. Three-quarters (75.2%) had a contraceptive method mix; they provided three or more contraceptive methods. In terms of modern contraceptive method types, 53.73% of the health facilities provided long-acting contraceptives, while 99.31% provided short-term contraceptive methods. The national average distance from family planning health facilities to the 2016 EDHS clusters was 6.35 kilometres. The 2016 EDHS-sampled clusters in the Somali region were the longest distance (18.58 km) from family planning facilities. Conversely, EDHS clusters in Addis Ababa were 0.55 kilometres from family planning facilities (see Table 3).

Table 3: The average distance from sampled family planning providing health facilities to demographic and health survey clusters in Ethiopia, 2016 ( $N = 1020$ )

| Region            | Population projection for 2016 (in thousands) * | Health facility type   |                             |                           |                              | Average distance (km) |
|-------------------|-------------------------------------------------|------------------------|-----------------------------|---------------------------|------------------------------|-----------------------|
|                   |                                                 | Hospitals <i>n</i> (%) | Health centres <i>n</i> (%) | Health posts <i>n</i> (%) | Private clinics <i>n</i> (%) |                       |
| Tigray            | 5,151                                           | 30 (28.30)             | 30 (28.30)                  | 25 (23.58)                | 21 (19.81)                   | 5.53                  |
| Afar              | 1,768                                           | 6 (10.71)              | 25 (44.64)                  | 16 (28.57)                | 9 (16.07)                    | 9.69                  |
| Amhara            | 20,771                                          | 26 (16.77)             | 46 (29.68)                  | 34 (21.94)                | 49 (31.61)                   | 8.47                  |
| Oromia            | 34,575                                          | 49 (25.26)             | 50 (25.77)                  | 43 (22.16)                | 52 (26.80)                   | 8.99                  |
| Somali            | 5,599                                           | 10 (20.41)             | 21 (42.86)                  | 12 (24.49)                | 6 (12.24)                    | 18.58                 |
| Benishangul-Gumuz | 1,035                                           | 2 (3.13)               | 16 (25.00)                  | 29 (45.31)                | 17 (26.56)                   | 5.28                  |
| SNNPR             | 18,720                                          | 24 (15.58)             | 40 (25.97)                  | 38 (24.68)                | 52 (33.77)                   | 7.08                  |
| Gambela           | 422                                             | 1 (1.79)               | 14 (25.00)                  | 22 (39.29)                | 19 (33.93)                   | 4.32                  |
| Harari            | 238                                             | 4 (9.30)               | 8 (18.60)                   | 21 (48.84)                | 10 (23.26)                   | 0.73                  |
| Addis Ababa       | 3,353                                           | 33 (42.31)             | 18 (23.08)                  | 0                         | 27 (34.62)                   | 0.55                  |
| Dire Dawa         | 453                                             | 6 (9.23)               | 15 (23.08)                  | 31 (47.69)                | 13 (20.00)                   | 0.60                  |
| Total             | 92,085                                          | 191 (18.73)            | 283 (27.75)                 | 271 (26.57)               | 275 (26.96)                  | 6.35                  |

Note: SNNPR =Southern Nations, Nationalities and Peoples Region.

\*Central Statistical Agency – Population Projections for Ethiopia: 2007 - 2037

### Modern Contraceptive Prevalence Rate

The prevalence of modern contraceptive use among married women was found to be 33.54% (urban 46.09%, 28.98% rural). The utilisation of modern contraceptives varied across the different regions and city administrations; the highest mCPR was reported in the Amhara region (51.65%), followed by Addis Ababa (50.08%) and the SNNPR (45.48%). Figure 1 shows the regional variations in mCPRs.

### Spatial Epidemiology of Modern Contraceptive Use

There is strong evidence to support spatial clustering in the utilisation of modern contraceptives among married women in Ethiopia (Global Moran's  $I = 0.24$ ;  $Z$ -score = 8.09;  $P < 0.0001$ ). Most of the hot spot areas, those with high contraceptive prevalence rates, were located in Addis Ababa and Amhara, followed by the Oromia region and the SNNPR. Conversely, the majority of the cold spot areas, those with low contraceptive prevalence rates, were located in the Somali, Afar and Gambela regions followed by Tigray and Benishangul-Gumuz. This clustering was supported by the  $G_i^*$  statistic when conducting the spatial analysis (see Figure 2).

### Determinants of Modern Contraceptive Use Among Married Women

The calculated ICC was 24.47%. This indicated that about 24% of the variability in using modern contraceptive methods was accounted for by location, leaving 76% of the variability to be accounted for by the differing characteristics of the women, or other unmeasured factors. The probability of using modern contraceptive methods in a typical region was estimated at 27.8%.

The strong individual-level predictors of modern contraceptive use among married women were their age, their husband/partner's education, household wealth, number of living children and exposure to family planning messages. Women who were in the age groups 35–39 years (44%), 40–44 years (55%) and 45–49 years (82%) were less likely to use modern contraceptives compared to those aged 15–19 years. A woman whose husband attained a primary level of education was 54% more likely to use modern contraceptives compared to those whose husband had no education. The odds ratio of modern contraceptive use increased with increasing wealth quintile. Women who were in the highest quintile were 5.26 times more likely to use the service compared to those in the lowest quintile. Women who had been exposed to family planning messages were 68% more likely to use modern contraceptives



1  
2  
3 relative to their counterparts with no exposure to family planning messages. Similarly, women  
4 who had one to four children were 2.31 times more likely to use the service compared to those  
5 having no child (see Table 4).  
6  
7

8  
9 At the regional level (level 2), only one variable was significantly associated with the use of  
10 modern contraceptives. A one-unit increase in the mean score of a health facility's readiness to  
11 provide short-term modern contraceptives in a typical region was associated with a 20-fold  
12 increase in the odds of modern contraceptive use (Table 4).  
13  
14  
15  
16

17 Finally, the majority of the variance between regions was explained by this model. The  
18 proportional change in variance indicated that the addition of predictors to the empty model  
19 explained an increased proportion of variation in modern contraceptive use. The variance  
20 estimates between regions decreased from 1.07 in the empty model to 0.18 in the final random  
21 intercept and random slope model. The proportion of variance explained by the final model  
22 was 83.18%. Similarly, the empty model showed that 24.47% of the variability in the odds of  
23 modern contraceptive use was explained by region-level characteristics (ICC = 24.47%). The  
24 between-region variability declined over successive models, from 24.47% in the empty model  
25 to 5.2% in the final model (see Table 4).  
26  
27  
28  
29  
30  
31  
32  
33  
34  
35  
36  
37  
38  
39  
40  
41  
42  
43  
44  
45  
46  
47  
48  
49  
50  
51  
52  
53  
54  
55  
56  
57  
58  
59  
60

Table 4: Factors Associated with Utilisation of Modern Contraceptives Among Married Women in Ethiopia ( $N = 8473$ )

| Predictors                                      |                                   | Frequency | Adjusted odds ratio<br>(95% confidence interval)<br>Modern contraceptive use |
|-------------------------------------------------|-----------------------------------|-----------|------------------------------------------------------------------------------|
| <b>Level 1 predictor variables</b>              |                                   |           |                                                                              |
| Age                                             | 15–19                             | 534       | 1.00                                                                         |
|                                                 | 20–24                             | 1436      | 1.26 (0.91, 1.76)                                                            |
|                                                 | 25–29                             | 1876      | 0.93 (0.67, 1.30)                                                            |
|                                                 | 30–34                             | 1591      | 0.74 (0.52, 1.04)                                                            |
|                                                 | 35–39                             | 1412      | <b>0.56 (0.39, 0.80)</b>                                                     |
|                                                 | 40–44                             | 953       | <b>0.45 (0.31, 0.65)</b>                                                     |
|                                                 | 45–49                             | 671       | <b>0.18 (0.12, 0.27)</b>                                                     |
| Husband/partner's level of education            | No education                      | 3774      | 1.00                                                                         |
|                                                 | Primary                           | 2651      | <b>1.54 (1.18, 2.02)</b>                                                     |
|                                                 | Secondary                         | 1060      | 1.29 (0.96, 1.73)                                                            |
|                                                 | Higher                            | 988       | 1.05 (0.77, 1.44)                                                            |
| Wealth quintile                                 | Lowest                            | 2361      | 1.00                                                                         |
|                                                 | Second                            | 1291      | <b>1.95 (1.27, 2.99)</b>                                                     |
|                                                 | Middle                            | 1184      | <b>2.65 (1.72, 4.08)</b>                                                     |
|                                                 | Fourth                            | 1158      | <b>3.42 (2.21, 5.28)</b>                                                     |
|                                                 | Highest                           | 2479      | <b>5.26 (3.46, 7.99)</b>                                                     |
| Number of living children                       | 0                                 | 813       | 1.00                                                                         |
|                                                 | 1–4                               | 5029      | <b>2.31 (1.64, 3.25)</b>                                                     |
|                                                 | $\geq 5$                          | 2631      | <b>2.05 (1.40, 3.01)</b>                                                     |
| Exposure to family planning messages            | No                                | 5826      | 1.00                                                                         |
|                                                 | Yes                               | 2647      | <b>1.68 (1.20, 2.36)</b>                                                     |
| <b>Level-2 predictor variables</b>              |                                   |           |                                                                              |
| General service readiness                       | Health facility management system |           | 1.27 (0.05, 35.69)                                                           |
|                                                 | Health facility infrastructure    |           | 1.51 (0.18, 12.95)                                                           |
| Family planning service availability            | Long-acting contraceptive methods |           | 5.04 (0.19, 136.21)                                                          |
|                                                 | Short-term contraceptive methods  |           | 1.79 (0.03, 103.48)                                                          |
| Family planning service readiness               | Long-acting contraceptives        |           | 0.43 (0.01, 17.12)                                                           |
|                                                 | Short-term contraceptives         |           | <b>20.49 (1.44, 29.54)</b>                                                   |
| Average distance to the nearest health facility |                                   |           | 1.02 (0.81, 1.28)                                                            |
| <b>Random effects (Error variance)</b>          |                                   |           |                                                                              |
| Var (Age)                                       |                                   |           | 0.05 (0.02, 0.15)                                                            |
| Var (Husband/partner's level of education)      |                                   |           | 0.05 (0.02, 0.22)                                                            |
| Var (Wealth quintile)                           |                                   |           | 0.14 (0.07, 0.32)                                                            |
| Var (Number of living children)                 |                                   |           | 0.08 (0.04, 0.29)                                                            |
| Var (Exposure to family planning messages)      |                                   |           | 0.09 (0.03, 0.61)                                                            |
| Var (constant)—level-2 variance                 |                                   |           | 0.18 (0.05, 3.70)                                                            |
| $\rho$ —Intra-class correlation                 |                                   |           | 0.05                                                                         |
| Fit statistics (-2 log-likelihood)              |                                   |           | 8860.49                                                                      |

## Discussion

In Ethiopia, the use of modern contraception varied by region. This is the first study to specifically identify hot spots and model the use of modern contraception using nationwide population and health facility data. Approximately 34% of married women use modern contraceptives; the highest mCPR was reported among urban married women (46.09% versus 28.98%). This is comparable with the findings of the 2011 EDHS data analysis where 27.3% of married women reported using modern contraceptive methods; the highest proportion was from urban areas (49.55% versus 22.5%) (9). There are also variations in modern contraceptive rate across different regions in the country. The highest contraceptive rate, more than 50% mCPR, was reported in the Amhara region and the Addis Ababa city administration. Conversely, the lowest, below 10% mCPR, was reported in the Somali and Afar regions. Even though there has been an increase in modern contraceptive use all over the country, it was found that there was significant regional variation in modern contraceptive use.

High mCPR spots (hot spots) were detected in the Amhara region and Addis Ababa, followed by the SNNPR and some parts of Oromia region. Conversely, the majority of low mCPR (cold spots) were detected in the Somali, Afar and Gambela regions followed by Tigray and Benishangul-Gumuz. In 2011, hot spots of modern contraceptive use were observed in Addis Ababa, followed by some parts of Amhara, Oromia and SNNPR. The lowest contraceptive rates (cold spots) were observed in the Afar, Somali and Gambela regions, and some parts of Tigray region (9). This indicated that the government is doing a good job in some of the regions, but is less successful in most regions. Due to this reason, the unmet need for modern contraception will be much higher than expected in most of those regions. Thus, cold spots (low rates of modern contraception) will be much more concentrated in those areas.

In Ethiopia, the use of modern contraceptives varied across the different regions and city administrations. The highest modern contraceptive prevalence rate was reported in the Amhara region, followed by Addis Ababa and SNNPR. This variation is demonstrated by the national DHSs conducted every five years since 2000. Over 16 years, between 2000 and 2016, the Amhara region and SNNPR showed an increase in the utilisation of modern contraceptives (8, 25-27). The large increase in the use of modern contraceptives in the Amhara region, as well as SNNPR, might be related to the high number of family planning organisations and the government's focus on these regions.

1  
2  
3 Different individual and regional factors were significantly associated with the use of modern  
4 contraceptives. The readiness of health facilities to provide short-term modern contraceptives  
5 was the only regional (level-2) variable that was significantly associated with the use of modern  
6 contraceptives. It was found that a one-unit increase in the mean score of the readiness of health  
7 facilities to provide short-term modern contraceptives was significantly associated with the  
8 utilisation of modern contraceptives. In a study that used DHS and SPA survey data from  
9 several East African countries (Kenya, Uganda, Rwanda and Tanzania), it was found that  
10 modern contraceptive utilisation was strongly associated with health facilities offering a wide  
11 range of contraceptives, and with a higher score of family planning service environment (16).  
12 Even though it is not directly related, in a study carried out in rural Ethiopia, researchers found  
13 that women who lived close to a health facility providing a wide range of contraceptives were  
14 more likely to use modern contraceptives (11). This indicated that the potential impact of  
15 family planning services should not be underestimated. Therefore, family planning health  
16 facilities should be fully equipped to provide a wide range of modern contraception.  
17  
18

19  
20  
21  
22  
23  
24  
25  
26  
27  
28 Among the individual factors, an increase in the age of women was significantly associated  
29 with a decrease in the use of modern contraceptives. This is similar to results of other studies  
30 carried out in Ethiopia, where the utilisation of modern contraceptives was negatively  
31 influenced by an increase in the age of women (9, 11, 12). This could be related to the  
32 knowledge gap, beliefs and/or attitudes that each woman has; as the age of a woman increases,  
33 the probability of changing her attitudes or beliefs towards contraception may reduce.  
34  
35  
36  
37  
38  
39

40 In Ethiopia, among the individual-level variables, the educational attainment of  
41 husband/partners was a significant predictor of the increase in modern contraceptive use. In a  
42 study conducted in the North Gondar, Amhara region of Ethiopia, it was found that the  
43 educational attainment of husbands was a significant predictor of women's contraceptive use  
44 (28). This might be due to the involvement of husbands in contraception decision-making. This  
45 is supported by other studies demonstrating the influence of discussing modern contraceptives  
46 with the husband and the husband's approval of using modern contraceptives (29, 30). It was  
47 found that the utilisation of modern contraceptives was significantly higher among women  
48 whose husbands had approved of using modern contraceptives. Similarly, the odds of using  
49 modern contraceptives was higher among those women who had discussed modern  
50 contraceptives with their husbands (29, 30). This indicated that a woman's husband's  
51  
52  
53  
54  
55  
56  
57  
58  
59  
60

1  
2  
3 education, as well as male involvement, has an important role in the use of modern  
4 contraceptives. Thus, educational opportunities for men and increasing male involvement in  
5 every family planning service should be emphasised for higher engagement in the use of  
6 modern contraception.  
7  
8  
9

10  
11 The increase in household wealth was a significant predictor of an increase in modern  
12 contraceptive utilisation. In two studies conducted in Ethiopia, including a study performed  
13 among rural women (11), it was found that women who were in the fourth and highest quintile  
14 were more likely to use modern contraceptives (9, 11). Family monthly income was  
15 significantly associated with the use of modern contraceptives (29). Wealth might directly or  
16 indirectly affect modern contraceptive use. Women might know about the importance of  
17 contraception. However, knowledge alone will not be important in some cases. They should  
18 have money for transport and service. The trade-off associated with the time they spent on  
19 traveling to and from health facilities is also important. They may use that particular time for  
20 household activities, farming, or other business-generating activities. For instance, in Ethiopia,  
21 despite family planning services being free of charge in public health facilities, the cost of  
22 transport might be attributable to the use of modern contraception. Moreover, the costs of  
23 family planning services in private health facilities might also be related to the use of modern  
24 contraceptives. Thus, the cost of transport and family planning service fees in private health  
25 facilities might not be important for wealthy families.  
26  
27  
28  
29  
30  
31  
32  
33  
34  
35  
36  
37

38 In this current study, it was found that, compared to having no children, having one or more  
39 living children increases the likelihood a woman will use modern contraceptives. In the 2011  
40 EDHS data analysis (9) and a study done in the SNNPR (12), researchers also found that an  
41 increase in the number of living children was significantly associated with an increase in  
42 modern contraceptive use. Among rural women in Ethiopia, an increase in parity was positively  
43 associated with an increase in modern contraceptive use (11). This finding is similar to studies  
44 done in Bangladesh, Pakistan and Tanzania, where it was reported that an increase in the  
45 number of living children was significantly associated with an increase in the use of modern  
46 contraceptives (13, 31, 32). This indicated that women's desire to have children might  
47 influence their contraceptive use behaviours: women with a high number of living children  
48 may be more likely to use contraception.  
49  
50  
51  
52  
53  
54  
55  
56  
57  
58  
59  
60

1  
2  
3 Exposure to family planning messages, the last individual-level variable in the multilevel  
4 model, showed an increase in the likelihood of using modern contraception. In a study done  
5 among women of reproductive age in the SNNPR region, it was found that the odds of modern  
6 contraceptive utilisation were significantly associated with women's overall knowledge of  
7 family planning methods. It was observed that women with good family planning knowledge  
8 were more likely to use modern contraceptives (12). Thus, exposure to family planning  
9 messages through different public and private media outlets is an important recommendation  
10 arising from this study.  
11  
12

13  
14  
15  
16  
17  
18 In this study, it was found that the utilisation of modern contraceptives varied across regions.  
19 The individual-level variables (age, husband/partner's education, wealth, number of living  
20 children and exposure to family planning messages) varied significantly across the regions. In  
21 a study in rural Ethiopia, it was found that the use of modern contraceptives was significantly  
22 higher in the Amhara and SNNPR regions (11). This might be related to variations in the  
23 availability and accessibility of different family planning services across administrative regions  
24 of the country. In addition to the multilevel analysis, this study has identified the hot spot and  
25 cold spot areas to help the government in improving the provision of modern contraceptives,  
26 especially those areas with the low rates of modern contraception.  
27  
28  
29  
30  
31  
32  
33

34  
35 This study identified both the demand- and supply-side determinants of modern contraceptive  
36 utilisation using a linked population and health facility data. This was overlooked in previous  
37 studies, which generally studied these factors separately. In addition to multilevel analysis, this  
38 study used spatial analyses to identify geographic variations in modern contraceptive  
39 utilisation. Taking a geographic perspective on family planning is very important for effective  
40 resource allocation and intervention, informed decision-making, and monitoring and  
41 evaluation purposes.  
42  
43  
44  
45  
46  
47

48 This study had several methodological limitations, most of which were minimised (17). The  
49 exclusion of DHS clusters without information relating to geographic coordinates, and using  
50 sampled health facilities, may underestimate or overestimate our study findings. This study did  
51 not consider sampling weights while running the multilevel analysis. DHSs provide an average  
52 weight (hv005 or v005); however, the GLIMMIX procedure in SAS requires weights at each  
53 level. Due to this issue, we could not able to apply sampling weights in the multilevel analysis.  
54  
55  
56  
57  
58  
59  
60

## Conclusion

In this study, it was found that more than one-third of married women in Ethiopia use modern contraceptives. It was also found that different individual-level variables, as well as regional-level variables, were predictors of modern contraceptive use. There is evidence of wide geographic variations in the use of modern contraceptives across the country. The findings of this study have several implications: first, regions with low contraceptive rates and high fertility rates should be targeted for scaling up and tailoring of services to the lifestyles of their populations. Second, available health facilities should be equipped to provide modern contraceptive methods. Strong emphasis should also be given to the contraceptive method mix/choice available at each health facility to increase contraceptive uptake. Third, increasing educational opportunities for men and increasing male involvement, and exposure to family planning messages are also important recommendations to arise from this research. The importance of awareness and the potential impact of services cannot be underestimated.

## Abbreviations

|       |                                                    |
|-------|----------------------------------------------------|
| CRS   | Coordinate Reference System                        |
| DHS   | Demographic and Health Survey                      |
| EAs   | Enumeration Areas                                  |
| EDHS  | Ethiopia Demographic and Health Survey             |
| ESPA+ | Ethiopia Service Provision Assessment Plus         |
| FDR   | False Discovery Rate                               |
| GIS   | Geographic Information Systems                     |
| HGLM  | Hierarchical Generalized Linear Model              |
| ICC   | Intra-class Correlation Coefficient                |
| IUD   | Intrauterine Device                                |
| mCPR  | modern Contraceptive Prevalence Rate               |
| SNNPR | Southern Nations, Nationalities and Peoples Region |
| SPA   | Service Provision Assessment                       |
| WGS84 | World Geodetic System 84                           |

## **Ethics approval**

Ethical approval was obtained from the Human Research Ethics Committee, The University of Newcastle on March 20, 2018 with a reference number H-2018-0066. We also got the Ethiopian Public Health Institute (EPHI) and the Measure DHS program approval to access the datasets.

## **Consent for publication**

Not applicable.

## **Availability of data and material**

All data relevant to the study are included in the article.

## **Competing interests**

The authors declared that they have no competing interests.

## **Funding**

Not applicable.

## **Authors' contributions**

TKT, CC, RS, DL conceptualized the design of the analysis. TKT developed and drafted the manuscript. CC, PF, TG, RS and DL participated in critically revising the intellectual contents of the manuscript. All authors read, provided feedback and approved the final manuscript.

## **Acknowledgements**

We thank the University of Newcastle, Australia for offering free access to the digital online library to search the electronic databases that were considered for this analysis. We also thank the Measure DHS Program and the Ethiopian Public Health Institute for providing free access to the data sets used for this analysis.



## References

1. World Bank. World Development Indicators. Washington, DC: World Bank; 2009.
2. Darroch JE, Singh S, Nadeau J. Contraception: an investment in lives, health and development. Issues in brief (Alan Guttmacher Institute). 2008(5):1-4.
3. Cleland J, Bernstein S, Ezeh A, Faundes A, Glasier A, Innis J. Family planning: the unfinished agenda. *The Lancet*. 2006;368(9549):1810-27.
4. Tsui AO, McDonald-Mosley R, Burke AE. Family planning and the burden of unintended pregnancies. *Epidemiologic reviews*. 2010;32(1):152-74.
5. Stover J, Winfrey W. The effects of family planning and other factors on fertility, abortion, miscarriage, and stillbirths in the Spectrum model. *BMC Public Health*. 2017;17(4):775.
6. Bearak J, Popinchalk A, Alkema L, Sedgh G. Global, regional, and subregional trends in unintended pregnancy and its outcomes from 1990 to 2014: estimates from a Bayesian hierarchical model. *Lancet Glob Health*. 2018;6(4):e380-e9.
7. Ba DM, Ssentongo P, Agbese E, Kjerulff KH. Prevalence and Predictors of contraceptive use among women of reproductive age in 17 sub-Saharan African countries: A large population-based study. *Sexual & Reproductive Healthcare*. 2019.
8. Central Statistical Agency (CSA) [Ethiopia], ICF. Ethiopia Demographic and Health Survey 2016. Addis Ababa, Ethiopia, and Rockville, Maryland, USA: CSA and ICF; 2016.
9. Lakew Y, Reda AA, Tamene H, Benedict S, Deribe K. Geographical variation and factors influencing modern contraceptive use among married women in Ethiopia: evidence from a national population based survey. *Reprod Health*. 2013;10(1):52.
10. Mandiwa C, Namondwe B, Makwinja A, Zamawe C. Factors associated with contraceptive use among young women in Malawi: analysis of the 2015–16 Malawi demographic and health survey data. *Contraception and Reproductive Medicine*. 2018;3(1):12.
11. Shiferaw S, Spigt M, Seme A, Amogne A, Skrøvseth S, Desta S, et al. Does proximity of women to facilities with better choice of contraceptives affect their contraceptive utilization in rural Ethiopia? *PLoS ONE*. 2017;12(11):e0187311.
12. Endriyas M, Eshete A, Mekonnen E, Misganaw T, Shiferaw M, Ayele S. Contraceptive utilization and associated factors among women of reproductive age group in Southern Nations Nationalities and Peoples' Region, Ethiopia: cross-sectional survey, mixed-methods. *Contraception and reproductive medicine*. 2017;2(1):10.
13. Stephenson R, Hennink M. Barriers to family planning service use among the urban poor in Pakistan. *Asia-Pacific Population Journal*. 2004;19(2):5-26.
14. Hong R, Montana L, Mishra V. Family planning services quality as a determinant of use of IUD in Egypt. *BMC Health Serv Res*. 2006;6(1):79.
15. Rose M, Abderrahim N, Stanton C, Helsel D. Maternity Care: A Comparative Report on the Availability and Use of Maternity Services. Data from the Demographic and Health Surveys Women's Module & Services Availability Module 1993-1996. MEASURE Evaluation Technical Report Series No. 9. Carolina Population Center, University of North Carolina at Chapel Hill; 2001.
16. Wang W, Wang S, Pullum T, Ametepi P. How family planning supply and the service environment affect contraceptive use: Findings from four East African countries. DHS Analytical Studies No. 26. Calverton, Maryland, USA: ICF International; 2012.
17. Tegegne TK, Chojenta C, Getachew T, Smith R, Loxton D. Service environment link and false discovery rate correction: Methodological considerations in population and health facility surveys. *PLoS ONE*. 2019;14(7):e0219860.
18. Burgert C, Zachary B. Incorporating geographic information into Demographic and Health Surveys: a field guide to GPS data collection. 2011.

19. Ethiopian Public Health Institute, ICF International. Ethiopia Service Provision Assessment Plus (ESPA+) Survey 2014. Addis Ababa, Ethiopia and Rockville, Maryland USA: Ethiopian Public Health Institute and ICF International; 2014.
20. Natural Earth. Free vector and raster map data [cited 31/05/2019]. Available from: <https://www.naturalearthdata.com/downloads/10m-cultural-vectors/>.
21. Ene M, Leighton EA, Blue GL, Bell BA, editors. Multilevel models for categorical data using SAS® PROC GLIMMIX: The basics. SAS Global Forum 2015 Proceedings; 2015.
22. Tom A, Bosker TASRJ, Bosker RJ. Multilevel analysis: an introduction to basic and advanced multilevel modeling: Sage; 1999.
23. Anselin L. Local indicators of spatial association—LISA. *Geographical analysis*. 1995;27(2):93-115.
24. Caldas de Castro M, Singer BH. Controlling the false discovery rate: a new application to account for multiple and dependent tests in local statistics of spatial association. *Geographical Analysis*. 2006;38(2):180-208.
25. Central Statistical Authority [Ethiopia], Macro O. Ethiopia Demographic and Health Survey 2000. Addis Ababa, Ethiopia and Calverton, Maryland, USA: Central Statistical Authority and ORC Macro.; 2001.
26. Central Statistical Agency [Ethiopia], ORC Macro. Ethiopia Demographic and Health Survey 2005. Addis Ababa, Ethiopia and Calverton, Maryland, USA: Central Statistical Agency and ORC Macro. ; 2006.
27. Central Statistical Agency [Ethiopia], ICF International. Ethiopia Demographic and Health Survey 2011. Addis Ababa, Ethiopia and Calverton, Maryland, USA: Central Statistical Agency and ICF International; 2012.
28. Kebede Y. Contraceptive prevalence in dembia district, northwest Ethiopia. *Ethiopian Journal of health development*. 2006;20(1):32-8.
29. Mohammed A, Woldeyohannes D, Feleke A, Megabiaw B. Determinants of modern contraceptive utilization among married women of reproductive age group in North Shoa Zone, Amhara Region, Ethiopia. *Reprod Health*. 2014;11(1):13.
30. Abraham W, Adamu A, Deresse D. The involvement of men in family planning an application of transtheoretical model in Wolaita Soddo Town South Ethiopia. *Asian Journal of Medical Sciences*. 2010;2(2):44-50.
31. Mostafa Kamal S, Aynul Islam M. Contraceptive use: socioeconomic correlates and method choices in rural Bangladesh. *Asia Pacific Journal of Public Health*. 2010;22(4):436-50.
32. Lwelamira J, Mnyamagola G, Msaki M. Knowledge, Attitude and Practice (KAP) towards modern contraceptives among married women of reproductive age in Mpwapwa District, Central Tanzania. *Current Research Journal of Social Sciences*. 2012;4(3):235-45.

## Figure Legends

Figure 1: Modern contraceptive use among married women in Ethiopia, 2016

Figure 2: Clusters of high and low modern contraceptive prevalence rates in Ethiopia, 2016

1  
2  
3  
4  
5  
6  
7  
8  
9  
10  
11  
12  
13  
14  
15  
16  
17  
18  
19  
20  
21  
22  
23  
24  
25  
26  
27  
28  
29  
30  
31  
32  
33  
34  
35  
36  
37  
38  
39  
40  
41  
42  
43  
44  
45  
46  
47  
48  
49  
50  
51  
52  
53  
54  
55  
56  
57  
58  
59  
60

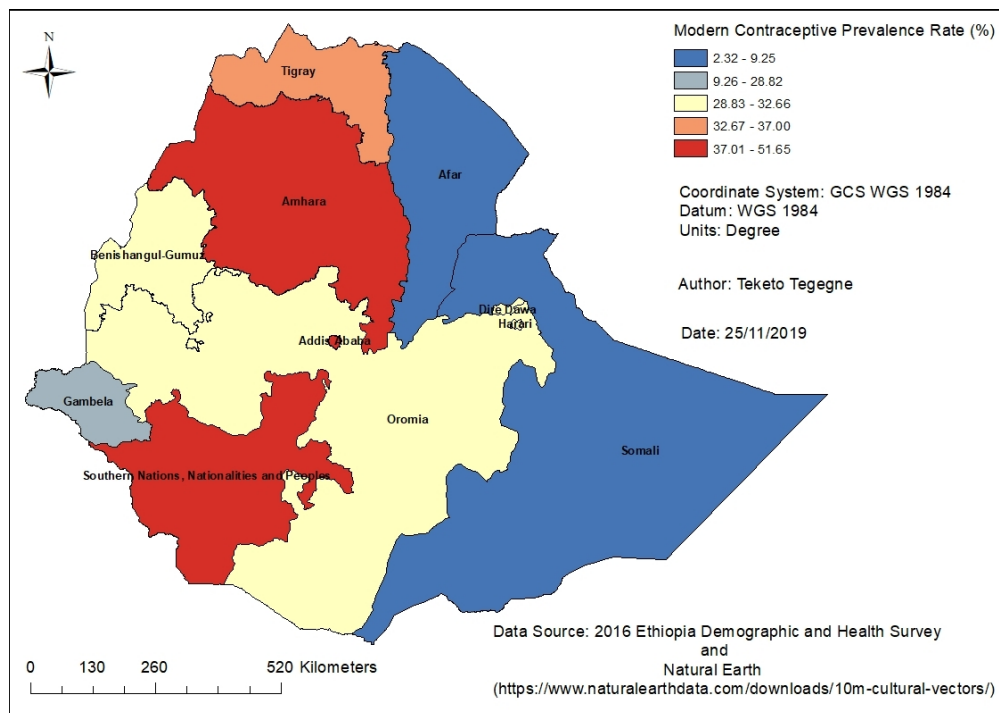

296x210mm (96 x 96 DPI)

1  
2  
3  
4  
5  
6  
7  
8  
9  
10  
11  
12  
13  
14  
15  
16  
17  
18  
19  
20  
21  
22  
23  
24  
25  
26  
27  
28  
29  
30  
31  
32  
33  
34  
35  
36  
37  
38  
39  
40  
41  
42  
43  
44  
45  
46  
47  
48  
49  
50  
51  
52  
53  
54  
55  
56  
57  
58  
59  
60

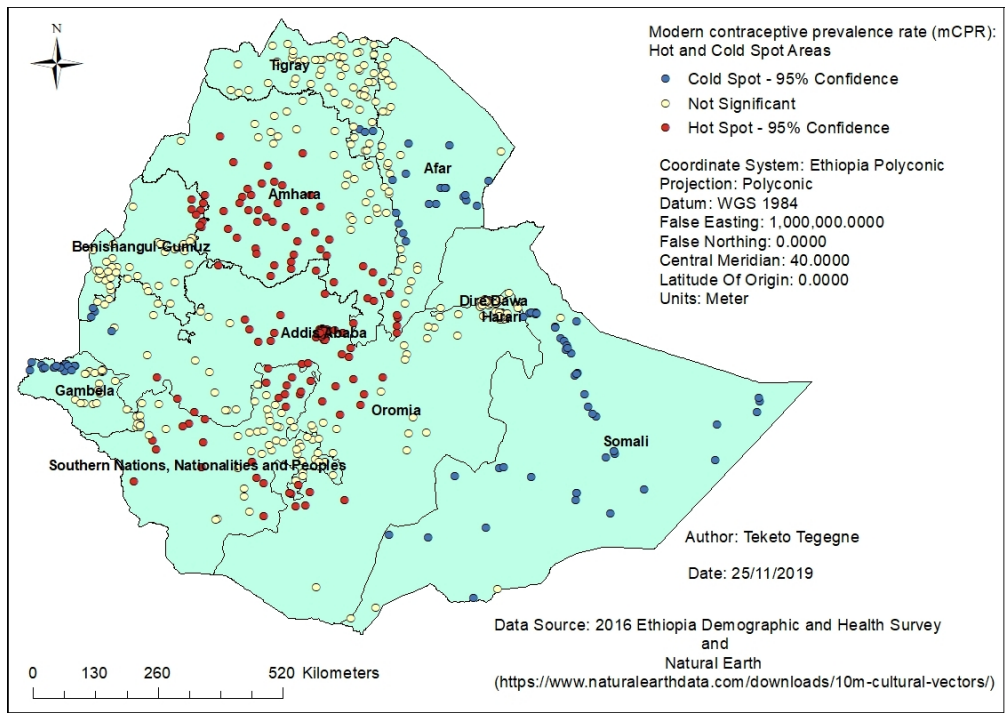

297x210mm (96 x 96 DPI)

STROBE Statement—Checklist of items that should be included in reports of *cross-sectional studies*

|                              | Item No | Recommendation                                                                                                                                                                                               | Page No |
|------------------------------|---------|--------------------------------------------------------------------------------------------------------------------------------------------------------------------------------------------------------------|---------|
| <b>Title and abstract</b>    | 1       | (a) Indicate the study's design with a commonly used term in the title or the abstract                                                                                                                       | 1       |
|                              |         | (b) Provide in the abstract an informative and balanced summary of what was done and what was found                                                                                                          | 2       |
| <b>Introduction</b>          |         |                                                                                                                                                                                                              |         |
| Background/rationale         | 2       | Explain the scientific background and rationale for the investigation being reported                                                                                                                         | 4 - 5   |
| Objectives                   | 3       | State specific objectives, including any prespecified hypotheses                                                                                                                                             | 5       |
| <b>Methods</b>               |         |                                                                                                                                                                                                              |         |
| Study design                 | 4       | Present key elements of study design early in the paper                                                                                                                                                      | 5 - 6   |
| Setting                      | 5       | Describe the setting, locations, and relevant dates, including periods of recruitment, exposure, follow-up, and data collection                                                                              | 5 - 6   |
| Participants                 | 6       | (a) Give the eligibility criteria, and the sources and methods of selection of participants                                                                                                                  | 5 - 6   |
| Variables                    | 7       | Clearly define all outcomes, exposures, predictors, potential confounders, and effect modifiers. Give diagnostic criteria, if applicable                                                                     | 6 - 7   |
| Data sources/<br>measurement | 8*      | For each variable of interest, give sources of data and details of methods of assessment (measurement). Describe comparability of assessment methods if there is more than one group                         | 5 - 7   |
| Bias                         | 9       | Describe any efforts to address potential sources of bias                                                                                                                                                    | 5 - 6   |
| Study size                   | 10      | Explain how the study size was arrived at                                                                                                                                                                    | 5 - 6   |
| Quantitative variables       | 11      | Explain how quantitative variables were handled in the analyses. If applicable, describe which groupings were chosen and why                                                                                 | 7 - 8   |
| Statistical methods          | 12      | (a) Describe all statistical methods, including those used to control for confounding                                                                                                                        | 8       |
|                              |         | (b) Describe any methods used to examine subgroups and interactions                                                                                                                                          | 8       |
|                              |         | (c) Explain how missing data were addressed                                                                                                                                                                  | 8       |
|                              |         | (d) If applicable, describe analytical methods taking account of sampling strategy                                                                                                                           |         |
|                              |         | (e) Describe any sensitivity analyses                                                                                                                                                                        |         |
| <b>Results</b>               |         |                                                                                                                                                                                                              |         |
| Participants                 | 13*     | (a) Report numbers of individuals at each stage of study—eg numbers potentially eligible, examined for eligibility, confirmed eligible, included in the study, completing follow-up, and analysed            | 9 - 16  |
|                              |         | (b) Give reasons for non-participation at each stage                                                                                                                                                         | 9 - 16  |
|                              |         | (c) Consider use of a flow diagram                                                                                                                                                                           | 9 - 16  |
| Descriptive data             | 14*     | (a) Give characteristics of study participants (eg demographic, clinical, social) and information on exposures and potential confounders                                                                     | 9 - 16  |
|                              |         | (b) Indicate number of participants with missing data for each variable of interest                                                                                                                          | 9 - 16  |
| Outcome data                 | 15*     | Report numbers of outcome events or summary measures                                                                                                                                                         | 14 - 15 |
| Main results                 | 16      | (a) Give unadjusted estimates and, if applicable, confounder-adjusted estimates and their precision (eg, 95% confidence interval). Make clear which confounders were adjusted for and why they were included | 14 - 16 |

|                          |    |                                                                                                                                                                            |         |
|--------------------------|----|----------------------------------------------------------------------------------------------------------------------------------------------------------------------------|---------|
|                          |    | (b) Report category boundaries when continuous variables were categorized                                                                                                  | 16      |
|                          |    | (c) If relevant, consider translating estimates of relative risk into absolute risk for a meaningful time period                                                           |         |
| Other analyses           | 17 | Report other analyses done—eg analyses of subgroups and interactions, and sensitivity analyses                                                                             | 15      |
| <b>Discussion</b>        |    |                                                                                                                                                                            |         |
| Key results              | 18 | Summarise key results with reference to study objectives                                                                                                                   | 17      |
| Limitations              | 19 | Discuss limitations of the study, taking into account sources of potential bias or imprecision. Discuss both direction and magnitude of any potential bias                 | 3, 20   |
| Interpretation           | 20 | Give a cautious overall interpretation of results considering objectives, limitations, multiplicity of analyses, results from similar studies, and other relevant evidence | 17 – 20 |
| Generalisability         | 21 | Discuss the generalisability (external validity) of the study results                                                                                                      | 21      |
| <b>Other information</b> |    |                                                                                                                                                                            |         |
| Funding                  | 22 | Give the source of funding and the role of the funders for the present study and, if applicable, for the original study on which the present article is based              | 22      |

\*Give information separately for exposed and unexposed groups.

**Note:** An Explanation and Elaboration article discusses each checklist item and gives methodological background and published examples of transparent reporting. The STROBE checklist is best used in conjunction with this article (freely available on the Web sites of PLoS Medicine at <http://www.plosmedicine.org/>, Annals of Internal Medicine at <http://www.annals.org/>, and Epidemiology at <http://www.epidem.com/>). Information on the STROBE Initiative is available at [www.strobe-statement.org](http://www.strobe-statement.org).

# BMJ Open

## Spatial variations and associated factors of modern contraceptive use in Ethiopia: a spatial and multilevel analysis

|                                 |                                                                                                                                                                                                                                                                                                                                                                                                                                                                                                                                                                                                        |
|---------------------------------|--------------------------------------------------------------------------------------------------------------------------------------------------------------------------------------------------------------------------------------------------------------------------------------------------------------------------------------------------------------------------------------------------------------------------------------------------------------------------------------------------------------------------------------------------------------------------------------------------------|
| Journal:                        | <i>BMJ Open</i>                                                                                                                                                                                                                                                                                                                                                                                                                                                                                                                                                                                        |
| Manuscript ID                   | bmjopen-2020-037532.R2                                                                                                                                                                                                                                                                                                                                                                                                                                                                                                                                                                                 |
| Article Type:                   | Original research                                                                                                                                                                                                                                                                                                                                                                                                                                                                                                                                                                                      |
| Date Submitted by the Author:   | 29-Jul-2020                                                                                                                                                                                                                                                                                                                                                                                                                                                                                                                                                                                            |
| Complete List of Authors:       | Tegegne, Teketo; Debre Markos University, Public Health; The University of Newcastle, School of Medicine and Public Health<br>Chojenta, Catherine; The University of Newcastle, School of Medicine and Public Health<br>Forder, Peta; The University of Newcastle, School of Medicine and Public Health<br>Getachew, Theodros ; Ethiopian Public Health Institute, Health System and Reproductive Health Research Directorate<br>Smith, Roger; The University of Newcastle, School of Medicine and Public Health<br>Loxton, Deborah; The University of Newcastle, School of Medicine and Public Health |
| <b>Primary Subject Heading</b>: | Epidemiology                                                                                                                                                                                                                                                                                                                                                                                                                                                                                                                                                                                           |
| Secondary Subject Heading:      | Global health, Health services research, Sexual health                                                                                                                                                                                                                                                                                                                                                                                                                                                                                                                                                 |
| Keywords:                       | EPIDEMIOLOGY, PUBLIC HEALTH, REPRODUCTIVE MEDICINE, STATISTICS & RESEARCH METHODS                                                                                                                                                                                                                                                                                                                                                                                                                                                                                                                      |
|                                 |                                                                                                                                                                                                                                                                                                                                                                                                                                                                                                                                                                                                        |

SCHOLARONE™  
Manuscripts



I, the Submitting Author has the right to grant and does grant on behalf of all authors of the Work (as defined in the below author licence), an exclusive licence and/or a non-exclusive licence for contributions from authors who are: i) UK Crown employees; ii) where BMJ has agreed a CC-BY licence shall apply, and/or iii) in accordance with the terms applicable for US Federal Government officers or employees acting as part of their official duties; on a worldwide, perpetual, irrevocable, royalty-free basis to BMJ Publishing Group Ltd ("BMJ") its licensees and where the relevant Journal is co-owned by BMJ to the co-owners of the Journal, to publish the Work in this journal and any other BMJ products and to exploit all rights, as set out in our [licence](#).

The Submitting Author accepts and understands that any supply made under these terms is made by BMJ to the Submitting Author unless you are acting as an employee on behalf of your employer or a postgraduate student of an affiliated institution which is paying any applicable article publishing charge ("APC") for Open Access articles. Where the Submitting Author wishes to make the Work available on an Open Access basis (and intends to pay the relevant APC), the terms of reuse of such Open Access shall be governed by a Creative Commons licence – details of these licences and which [Creative Commons](#) licence will apply to this Work are set out in our licence referred to above.

Other than as permitted in any relevant BMJ Author's Self Archiving Policies, I confirm this Work has not been accepted for publication elsewhere, is not being considered for publication elsewhere and does not duplicate material already published. I confirm all authors consent to publication of this Work and authorise the granting of this licence.



# Spatial variations and associated factors of modern contraceptive use in Ethiopia: a spatial and multilevel analysis

Teketo Kassaw Tegegne <sup>1, 2, 4\*</sup>, Catherine Chojenta <sup>2</sup>, Peta Forder <sup>2</sup>, Theodros Getachew <sup>5</sup>, Roger Smith <sup>3</sup>, Deborah Loxton <sup>2</sup>

<sup>1</sup> Department of Public Health, College of Health Sciences, Debre Markos University, Debre Markos, Ethiopia

<sup>2</sup> Research Centre for Generational Health and Ageing, Hunter Medical Research Institute, School of Medicine and Public Health, University of Newcastle, Newcastle, New South Wales, Australia

<sup>3</sup> Mothers and Babies Research Centre, Hunter Medical Research Institute, School of Medicine and Public Health, University of Newcastle, Newcastle, New South Wales, Australia

<sup>4</sup> The Australian College of Health Informatics, Sydney, New South Wales, Australia

<sup>5</sup> Health System and Reproductive Health Research Directorate, Ethiopian Public Health Institute, Addis Ababa, Ethiopia

## Email address:

TKT: [kteketo@yahoo.com](mailto:kteketo@yahoo.com) or [TeketoKassaw.Tegegne@uon.edu.au](mailto:TeketoKassaw.Tegegne@uon.edu.au)

CC: [Catherine.Chojenta@newcastle.edu.au](mailto:Catherine.Chojenta@newcastle.edu.au)

PF: [peta.forder@newcastle.edu.au](mailto:peta.forder@newcastle.edu.au)

TG: [tedi.getachew@yahoo.com](mailto:tedi.getachew@yahoo.com)

RS: [Roger.Smith@newcastle.edu.au](mailto:Roger.Smith@newcastle.edu.au)

DL: [Deborah.Loxton@newcastle.edu.au](mailto:Deborah.Loxton@newcastle.edu.au)

\* **Corresponding author**

## Abstract

**Objective:** To assess spatial variations in modern contraceptive use and to identify factors associated with it among married women in Ethiopia.

**Design:** Cross-sectional analysis of population-based and health facility data.

**Setting:** Ethiopia Demographic and Health Survey data linked to Service Provision Assessment data.

**Population:** Eight thousand four hundred and seventy-three married women and 1020 facilities that reported providing family planning services.

**Methods:** A linked secondary data analysis of population and health facility data was carried out. Both multilevel and spatial analyses were conducted to identify key determinants of women's use of modern contraceptive and spatial clustering of modern contraceptive use.

**Main outcome measure:** Modern contraceptive use.

**Results:** About 24% of the variation in the use of modern contraception was accounted for by location. A one-unit increase in the mean score of health facilities' readiness to provide short-term modern contraceptives in a typical region was associated with a 20-fold increase in the odds of modern contraceptive use (Adjusted Odds Ratio [AOR] = 20.49, 95% CI 1.44 - 29.54). In the spatial analysis, it was found that Addis Ababa and the Amhara region had high clusters of modern contraceptive use rates. On the other hand, low rates of contraceptive use were clustered in the Afar and Somali regions.

**Conclusion:** There were significant variations in the use of modern contraceptives across the different regions of Ethiopia. Therefore, regions with low contraceptive rates and high fertility rates should be targeted for scaling up and tailoring of services to the culture and lifestyles of the population of those regions.

**Keywords:** Modern contraceptives, spatial variations, family planning methods

### Strengths and limitations of this study

- This study identified both the demand and supply-side determinants of modern contraceptive utilization using a linked population and health facility data.
- In addition to multilevel analysis, this study used spatial analyses to identify geographic variations of modern contraceptive utilization.
- This study excluded DHS clusters without geographic coordinates and used sampled health facilities that might under or overestimate the study finding.
- This study did not consider sampling weights while running the multilevel analysis.
- DHS surveys provide an average weight (hv005 or v005); however, the GLIMMIX procedure in SAS requires weights at each level that did not enable to apply sampling weights in the multilevel analysis.

## Introduction

Worldwide, modern contraceptives are important in fertility control (1). In developing countries, contraceptives have a clear effect on the health of women, children and families. For instance, contraceptives are estimated to prevent 2.7 million infant deaths and the loss of 60 million healthy lives a year worldwide (2). In countries with high fertility rates, promoting contraceptives averts 32% of all maternal deaths and approximately 10% of child mortality. Modern contraceptives also make a huge contribution to the achievement of universal primary schooling, female empowerment, and in reducing poverty and hunger (3). Family planning is also important in preventing unintended pregnancies and unsafe abortions (4, 5).

Despite its importance, access to and utilisation of modern contraceptives vary worldwide. Women in developed countries have better access to and use of contraceptives compared to women in developing countries (4). In a study from 2010–2014, it was reported that the global burden of unintended pregnancies was 44%; the rate of unintended pregnancies is substantially higher in developing countries compared to developed regions (6). Higher levels of unmet need for contraception could contribute to higher rates of unintended pregnancies in developing regions. For instance, in sub-Saharan Africa, the prevalence of contraceptive use among women of reproductive age is only 17% (7).

Similarly, the utilisation of modern contraceptives is a common healthcare challenge in Ethiopia. Even though there is an increase in women's use of modern contraceptives, challenges remain (8). Discrepancies in the use of modern contraceptives are common within the different parts of the country. For instance, the Somali region accounts for the lowest rate of modern contraceptive use (1.4%), compared to Addis Ababa (50.1%) (8).

The utilisation of modern contraceptives can be influenced by both demand- and supply-side factors. In previous studies, more emphasis has been given to the importance of demand-side factors (7). Most of the investigated demand-side factors were women's education (7, 9), age (9, 10), household wealth (7, 9, 11) and parity (12, 13). The importance of supply-side factors has been largely overlooked. In some studies, it was reported that the supply-side factors have influence on contraceptive use. For instance, the quality of family planning services (14) and living close to a family planning facility (15) were significantly associated with modern contraceptive utilisation. In East Africa, it was observed that the utilisation of modern

1  
2  
3 contraceptives was higher among facilities providing different contraceptive methods and with  
4 higher family planning service environment scores (16).  
5  
6  
7

8 Due to the increasing availability of geographically referenced health facility and population  
9 data, it is possible to do geographically linked analyses (17). This opportunity allows  
10 identification of the location of existing health facilities as well as mapping the eligible  
11 population without access to a particular health service, such as family planning. This further  
12 enables identification of both the demand- and supply-side factors and helps the government  
13 determine where future investments should be targeted.  
14  
15  
16  
17

18  
19 This study aimed to assess spatial variations in the use of modern contraceptives among  
20 married women in Ethiopia and identify the potential factors associated with the use of modern  
21 contraceptives among married women throughout the country, using the national population  
22 and health facility data. Contraception is more critical for women of reproductive age.  
23 However, married women or women in union are more likely to be sexually active as opposed  
24 to single, divorced or widowed women, particularly in Ethiopia where sex outside of a union  
25 is uncommon. Therefore, this study focused on only married women's modern contraceptive  
26 use.  
27  
28  
29  
30  
31  
32

## 33 **Methods**

### 34 **Data Sources**

35  
36 The main data sources of this study were the 2016 Ethiopia Demographic and Health Survey  
37 (EDHS) and the 2014 Ethiopian Service Provision Assessment Plus (ESPA+). Ethical approval  
38 was obtained from the DHS program Institutional Review Board and the Ethiopian Public  
39 Health Institute. Furthermore, this study was ethically approved by the Human Research Ethics  
40 Committee, The University of Newcastle on March 20, 2018 (approval number H-2018-0066).  
41  
42  
43  
44  
45  
46

47  
48 The 2016 EDHS collected information on population characteristics, such as contraception and  
49 obstetric care use. The survey details can be found elsewhere (8, 17). The geographic  
50 coordinates of each survey cluster were also collected (18). In the population survey, all women  
51 aged 15–49 years were eligible for individual interviews. The survey identified 16583 eligible  
52 women. Of these women, from 645 DHS clusters, 15683 were interviewed.  
53  
54  
55  
56  
57  
58  
59  
60

1  
2  
3  
4  
5  
6  
7  
8  
9  
10  
11  
12  
13  
14  
15  
16  
17  
18  
19  
20  
21  
22  
23  
24  
25  
26  
27  
28  
29  
30  
31  
32  
33  
34  
35  
36  
37  
38  
39  
40  
41  
42  
43  
44  
45  
46  
47  
48  
49  
50  
51  
52  
53  
54  
55  
56  
57  
58  
59  
60

Contraception is more critical for women of reproductive age. However, married women or women in union are more likely to be sexually active as opposed to single, divorced or widowed women, particularly in Ethiopia where sex outside of a union is uncommon. Therefore, this study focused on only married women's modern contraceptive use. In this analysis, 8473 married women who were not pregnant at the time of the interview were included from 622 DHS clusters. A total of 261 married, non-pregnant women from 23 clusters were excluded from the analysis since they had missing geographic coordinates.

The main source of the health facility data was the 2014 ESPA+ survey (19). The ESPA+ survey had information on service availability and readiness, including family planning services (19). Details of the survey can be found elsewhere (17, 19). The ESPA+ survey collected data from 1165 facilities. The survey used a combination of a census of hospitals and a sample of other health facilities (health centres, health posts and clinics). Of the 1165 facilities, 1020 facilities reported providing family planning services. In this analysis, 1020 facilities that reported providing family planning services were included.

### **Data Linking Method**

In this study, we used an administrative boundary link for linking health facility data with the population data (17). Details of this method can be found elsewhere (17). Ethiopia's administrative boundaries, used in this study, were obtained from Natural Earth (20).

### **Health Service Environment**

Four health service environment variable scores were created (average distance to the nearest family planning facility, family planning service availability, readiness to provide family planning services and general health facility readiness). All service availability and readiness scores were computed for the nearest family planning providing facilities. Details of this computation can be found elsewhere (17). Average straight-line distance to the nearest family planning providing facility was calculated after linking each DHS cluster with an ESPA+ survey facility (17). First, the distance from each cluster to every family planning providing facility within the administrative boundaries was calculated. Second, the nearest family planning providing facility was identified, and the average distance was computed per region.

1  
2  
3 In terms of the general service readiness score, eight general service readiness dimensions were  
4 obtained using principal component analysis (17). The average general service readiness score  
5 per region/city administration was computed using the SAS SCORE procedure. The first two  
6 principal components were used to compute two general service readiness scores (health  
7 facility management system and infrastructure). Further, indices of family planning availability  
8 and readiness were computed. Two family planning availability scores (long-acting and short-  
9 term contraceptive methods) were created using seven variables (17). Two family planning  
10 readiness scores (readiness to provide long-acting and short-term contraceptives) were created  
11 using seven variables (17).  
12  
13  
14  
15  
16  
17  
18  
19

## 20 **Outcome and Explanatory Variables**

### 21 **Explanatory Variables**

22 The explanatory variables of this study were sociodemographic (7, 9-11) and obstetric  
23 characteristics (11-13) and health facility variables (11, 14-16). The sociodemographic  
24 characteristics include age, education, occupation, husband/partner education and occupation,  
25 wealth, place of residence, and average distance to the nearest family planning facility. The  
26 obstetric characteristics were parity, the number of living children, ever use of modern  
27 contraception, and exposure to family planning messages. Further, the health facility variables  
28 were general service readiness, family planning service availability and family planning service  
29 readiness.  
30  
31  
32  
33  
34  
35  
36  
37  
38

39 The occupational status of respondents was grouped into four categories: have no work,  
40 agricultural work, professional/technical/managerial work, and others. This was done based on  
41 the DHS occupation grouping. Respondents who responded not working at the time of the  
42 interview or did not work in the last 12 months before the survey were grouped as have no  
43 work. Professional/technical/managerial category constitutes teaching professionals, health  
44 professionals, business and administration professionals, legal and social workers, managers,  
45 etc. Agricultural categories also include fishermen, foresters and hunters. Other categories  
46 include daily laborers, street and related sales and service workers.  
47  
48  
49  
50  
51  
52  
53  
54  
55  
56  
57  
58  
59  
60

1  
2  
3 Exposure to family planning messages was measured based on three DHS questions. The DHS  
4 collected data on woman's exposure to family planning messages whether the respondent has  
5 heard about family planning in the last few months (preceding the survey) from any of the  
6 following sources: a) heard family planning on the radio last months, b) heard family planning  
7 on TV last months and c) heard family planning from the newspaper last months. In this paper,  
8 exposure to the contraceptive message was measured if the respondent had exposure to one or  
9 more information sources.  
10  
11  
12  
13  
14

### 15 16 **Outcome Variable**

17 The outcome variable of this study was modern contraceptive use. A woman was considered  
18 to be using modern contraception if she used any of the modern contraceptive methods other  
19 than male condoms (17). The male condom could be accessed from shops that the ESPA+  
20 survey did not capture.  
21  
22  
23  
24  
25

### 26 **Statistical Analysis**

#### 27 **Multilevel Analysis**

28 To account for the nested nature of DHS data, a two-level generalised linear mixed model was  
29 used. This study had binary outcomes: whether a married woman used modern contraception  
30 or not. We were interested in the probability of modern contraceptive utilisation and the  
31 influence of individual and regional characteristics. The equation used to estimate the two-level  
32 hierarchical model can be found elsewhere (17).  
33  
34  
35  
36  
37  
38  
39

40 Binary distribution with the logit link function was used to model this binary outcome. To  
41 estimate this model, the GLIMMIX procedure in SAS was used (21). Four model building  
42 processes were undertaken. The Laplace estimation was used for estimating these models. The  
43 model building process began with an empty model. By checking improvements in model fit,  
44 complex models were built step by step. The random effects were measured by the intra-class  
45 correlation coefficient (ICC) and proportional change in variance (PCV). The variance estimate  
46 from each successive model was used to calculate the intra-class correlation coefficient (ICC)  
47 (21). Details of calculating ICC in hierarchical generalised linear models can be found  
48 elsewhere (17, 22). The PCV was used to measure the change in the area level variance between  
49 the empty model and the individual level model, and between successive models (23, 24). It  
50 was calculated using this mathematical equation:  $PCV = \frac{V_{n-1} - V_{n-2}}{V_{n-1}}$ ; where  $V_{n-1}$  is the  
51  
52  
53  
54  
55  
56  
57  
58  
59  
60



1  
2  
3 neighbourhood variance in the empty model and  $V_{n-2}$  is the neighbourhood variance in the  
4 subsequent model.  
5  
6  
7

### 8 **Model Fit Statistics**

9  
10 The Akaike Information Criteria (AIC) and Schwarz's Bayesian Information Criteria (BIC)  
11 were used to assess the best-fitting model (21). The AIC and BIC values of each successive  
12 model were compared, and the model with the lowest value was considered as the best-fitting  
13 model (25, 26). During model building process, it is possible to increase the likelihood of fitting  
14 models by adding parameters. However, increasing model parameters can result in overfitting.  
15 Unlike statistical methods that employ hypothesis testing approaches like log-likelihood ratio  
16 test, AIC and BIC penalise the deviance for a larger number of parameters (26-28). Thus, they  
17 prevent overfitting by introducing a penalty term for the number of parameters in the model.  
18  
19  
20  
21  
22  
23

### 24 **Spatial Analysis**

25  
26 ArcGIS 10.6.1 was used to do spatial analyses. The Ethiopian Polyconic Projected Coordinate  
27 System (17) was used to flatten the Ethiopian map. Hot spot analysis was carried out to identify  
28 spatial clusters of modern contraceptive use. DHS clusters were the unit of spatial analyses.  
29  
30  
31

32  
33 We followed three analyses procedures while doing the hot spot analysis, as discussed  
34 elsewhere (17). First, we ran the Global Moran's I statistic, which is a global measure of spatial  
35 autocorrelation (29). Second, based on the Global Moran's I statistic, incremental spatial  
36 autocorrelation was run to determine the critical distance at which clustering of modern  
37 contraception prevalence rate (mCPR) peaked (165 km) (17). Last, the *Getis-Ord Gi\** statistic  
38 was run to identify statistically significant spatial clusters of mCPR (17). The two statistical  
39 problems of local statistics of spatial association (multiple comparison and spatial dependence)  
40 were controlled using an FDR correction (17, 30).  
41  
42  
43  
44  
45  
46  
47

### 48 **Patient and Public Involvement**

49  
50 This study used secondary data sets: 2016 EDHS and 2014 ESPA+ that were previously  
51 collected with confidentiality information maintained (no personal identifier used). The data  
52 were collected under the collaboration of The Ethiopian Federal Ministry of Health, Ethiopian  
53 Central Statistical Agency, Ethiopian Public Health Institute and USAID. Hence, as we did not  
54 collect the data directly from participants, no recruitment and contact of participants were  
55 required for this analysis.  
56  
57  
58  
59  
60

## Results

### Sociodemographic Characteristics

The mean age of the study participants was 31.09 (standard deviation of  $\pm 8.22$ ) years. Regarding education, 57.46% of the women had no formal education, while 27.58% had primary level education. In terms of wealth, 29.26% of the women fell in the richest quintile and 27.86% were grouped in the poorest quintile. Regarding religion, 38.27% of respondents identified as Orthodox Christian and 41% as Muslim. Seventy-three percent of the respondents were from rural areas (see Table 1).

For peer review only

Table 1: Sociodemographic characteristics of married women in Ethiopia, 2016 (N = 8473)

|                                      | Variable                               | Frequency | Percentage |
|--------------------------------------|----------------------------------------|-----------|------------|
| Age                                  | 15–19                                  | 534       | 6.30       |
|                                      | 20–24                                  | 1436      | 16.95      |
|                                      | 25–29                                  | 1876      | 22.14      |
|                                      | 30–34                                  | 1591      | 18.78      |
|                                      | 35–39                                  | 1412      | 16.66      |
|                                      | 40–44                                  | 953       | 11.25      |
|                                      | 45–49                                  | 671       | 7.92       |
| Level of education                   | No education                           | 4869      | 57.46      |
|                                      | Primary                                | 2337      | 27.58      |
|                                      | Secondary                              | 773       | 9.12       |
|                                      | Higher                                 | 494       | 5.83       |
| Occupation                           | Have no work                           | 6030      | 71.17      |
|                                      | Professional/technical/managerial work | 1310      | 15.46      |
|                                      | Agricultural work                      | 749       | 8.84       |
|                                      | Other                                  | 384       | 4.53       |
| Husband/partner's level of education | No education                           | 3774      | 44.54      |
|                                      | Primary                                | 2651      | 31.29      |
|                                      | Secondary                              | 1060      | 12.51      |
|                                      | Higher                                 | 988       | 11.66      |
| Husband/partner's occupation         | Have no work                           | 851       | 10.04      |
|                                      | Professional/technical/managerial work | 2592      | 30.59      |
|                                      | Agricultural work                      | 4208      | 49.66      |
|                                      | Other                                  | 822       | 9.70       |
| Head of household*                   | Someone else                           | 7147      | 84.35      |
|                                      | Woman - herself                        | 1326      | 15.65      |
| Family size                          | 1–4                                    | 3050      | 36.00      |
|                                      | 5–8                                    | 4564      | 53.86      |
|                                      | ≥ 9                                    | 859       | 10.14      |
| Wealth quintile                      | Lowest                                 | 2361      | 27.86      |
|                                      | Second                                 | 1291      | 15.24      |
|                                      | Middle                                 | 1184      | 13.97      |
|                                      | Fourth                                 | 1158      | 13.67      |
|                                      | Highest                                | 2479      | 29.26      |
| Religion                             | Orthodox                               | 3243      | 38.27      |
|                                      | Protestant                             | 1597      | 18.85      |
|                                      | Muslim                                 | 3474      | 41.00      |
|                                      | Other                                  | 159       | 1.88       |
| Residence                            | Urban                                  | 2261      | 26.68      |
|                                      | Rural                                  | 6212      | 73.32      |

\* The head of household was dichotomised as the woman herself or someone else (this include her husband and other family members, such father-in law and mother-in law).

### Women's Obstetric Characteristics

Of the 8473 married women, 7721 (91.12%) had ever given birth. The mean age at first childbirth was 18.98 (standard deviation of  $\pm 3.85$ ) years. In terms of parity, 37.11% of married women had five or more births; 31.05% of the women had more than four living children. Among the 5708 women who were pregnant in the previous five years, 1853 (32.46%) had no ANC visits for their most recent pregnancy. There were 19.40% of women who reported they had the autonomy to decide on their own healthcare needs. Under one-third (31.24%) of women had been exposed to family planning messages. More than half (52.79%) of married women had ever used contraceptive methods. Of the 8473 married women, 5519 (65.14%) were not using any contraceptive methods at the time of the survey. Among these women, 1957 (35.46%) had a future intention to use contraception (see Table 2).

Table 2: Obstetric characteristics of married women in Ethiopia, 2016 (*N* = 8473)

|                                                                                    | Variable                | Frequency | Percentage |
|------------------------------------------------------------------------------------|-------------------------|-----------|------------|
| Parity                                                                             | 0                       | 752       | 8.88       |
|                                                                                    | 1–4                     | 4577      | 54.02      |
|                                                                                    | ≥ 5                     | 3144      | 37.11      |
| Number of living children                                                          | 0                       | 813       | 9.60       |
|                                                                                    | 1–4                     | 5029      | 59.35      |
|                                                                                    | ≥ 5                     | 2631      | 31.05      |
| Age at first childbirth<br>( <i>n</i> = 7721)                                      | ≤ 19 years              | 5618      | 66.30      |
|                                                                                    | 20–24 years             | 2224      | 26.25      |
|                                                                                    | ≥ 25 years              | 631       | 7.45       |
| Number of ANC visits<br>( <i>n</i> = 5708)                                         | 0                       | 1853      | 32.46      |
|                                                                                    | 1–3                     | 1688      | 29.57      |
|                                                                                    | ≥ 4                     | 2167      | 37.96      |
| Autonomy in personal<br>healthcare decision-making                                 | Respondent alone        | 1644      | 19.40      |
|                                                                                    | Joint decision          | 5298      | 62.53      |
|                                                                                    | Husband/partner alone   | 1531      | 18.07      |
| Autonomy in family<br>planning decision-making<br>( <i>n</i> = 2954)               | Mainly respondent       | 724       | 24.51      |
|                                                                                    | Mainly husband/partner  | 149       | 5.04       |
|                                                                                    | Joint decision          | 2081      | 70.45      |
| Knowledge of modern<br>contraceptive methods                                       | No                      | 324       | 3.82       |
|                                                                                    | Yes                     | 8149      | 96.18      |
| Exposure to family planning<br>messages                                            | No                      | 5826      | 68.76      |
|                                                                                    | Yes                     | 2647      | 31.24      |
| Ever used any contraceptive<br>method                                              | No                      | 4000      | 47.21      |
|                                                                                    | Yes                     | 4473      | 52.79      |
| Non-users' future intention<br>to use a contraceptive<br>method ( <i>n</i> = 5519) | Intends to use later    | 1957      | 35.46      |
|                                                                                    | Unsure about future use | 90        | 1.63       |
|                                                                                    | Does not intend to use  | 3472      | 62.91      |

### Health Facility Characteristics

Data were collected from 1165 health facilities nationwide. Among them, 18.73% were hospitals and 27.75% were health centres. Regarding health facility managing body, 68.43% of the health facilities were managed by the government. Of the facilities, 1020 (87.55%) provided family planning services. Three-quarters (75.2%) had a contraceptive method mix; they provided three or more contraceptive methods. In terms of modern contraceptive method types, 53.73% of the health facilities provided long-acting contraceptives, while 99.31% provided short-term contraceptive methods. The national average distance from family planning health facilities to the 2016 EDHS clusters was 6.35 kilometres. The 2016 EDHS-sampled clusters in the Somali region were the longest distance (18.58 km) from family planning facilities. Conversely, EDHS clusters in Addis Ababa were 0.55 kilometres from family planning facilities (see Table 3).

Table 3: The average distance from sampled family planning providing health facilities to demographic and health survey clusters in Ethiopia, 2016 ( $N = 1020$ )

| Region            | Population projection for 2016 (in thousands) * | Health facility type   |                             |                           |                              | Average distance (km) |
|-------------------|-------------------------------------------------|------------------------|-----------------------------|---------------------------|------------------------------|-----------------------|
|                   |                                                 | Hospitals <i>n</i> (%) | Health centres <i>n</i> (%) | Health posts <i>n</i> (%) | Private clinics <i>n</i> (%) |                       |
| Tigray            | 5,151                                           | 30 (28.30)             | 30 (28.30)                  | 25 (23.58)                | 21 (19.81)                   | 5.53                  |
| Afar              | 1,768                                           | 6 (10.71)              | 25 (44.64)                  | 16 (28.57)                | 9 (16.07)                    | 9.69                  |
| Amhara            | 20,771                                          | 26 (16.77)             | 46 (29.68)                  | 34 (21.94)                | 49 (31.61)                   | 8.47                  |
| Oromia            | 34,575                                          | 49 (25.26)             | 50 (25.77)                  | 43 (22.16)                | 52 (26.80)                   | 8.99                  |
| Somali            | 5,599                                           | 10 (20.41)             | 21 (42.86)                  | 12 (24.49)                | 6 (12.24)                    | 18.58                 |
| Benishangul-Gumuz | 1,035                                           | 2 (3.13)               | 16 (25.00)                  | 29 (45.31)                | 17 (26.56)                   | 5.28                  |
| SNNPR             | 18,720                                          | 24 (15.58)             | 40 (25.97)                  | 38 (24.68)                | 52 (33.77)                   | 7.08                  |
| Gambela           | 422                                             | 1 (1.79)               | 14 (25.00)                  | 22 (39.29)                | 19 (33.93)                   | 4.32                  |
| Harari            | 238                                             | 4 (9.30)               | 8 (18.60)                   | 21 (48.84)                | 10 (23.26)                   | 0.73                  |
| Addis Ababa       | 3,353                                           | 33 (42.31)             | 18 (23.08)                  | 0                         | 27 (34.62)                   | 0.55                  |
| Dire Dawa         | 453                                             | 6 (9.23)               | 15 (23.08)                  | 31 (47.69)                | 13 (20.00)                   | 0.60                  |
| Total             | 92,085                                          | 191 (18.73)            | 283 (27.75)                 | 271 (26.57)               | 275 (26.96)                  | 6.35                  |

Note: SNNPR =Southern Nations, Nationalities and Peoples Region.

\*Central Statistical Agency – Population Projections for Ethiopia: 2007 - 2037

### Modern Contraceptive Prevalence Rate

The prevalence of modern contraceptive use among married women was found to be 33.54% (urban 46.09%, 28.98% rural). The utilisation of modern contraceptives varied across the different regions and city administrations; the highest mCPR was reported in the Amhara region (51.65%), followed by Addis Ababa (50.08%) and the SNNPR (45.48%). Figure 1 shows the regional variations in mCPRs.

### Spatial Epidemiology of Modern Contraceptive Use

There is strong evidence to support spatial clustering in the utilisation of modern contraceptives among married women in Ethiopia (Global Moran's  $I = 0.24$ ;  $Z$ -score = 8.09;  $P < 0.0001$ ). Most of the hot spot areas, those with high contraceptive prevalence rates, were located in Addis Ababa and Amhara, followed by the Oromia region and the SNNPR. Conversely, the majority of the cold spot areas, those with low contraceptive prevalence rates, were located in the Somali, Afar and Gambela regions followed by Tigray and Benishangul-Gumuz. This clustering was supported by the  $G_i^*$  statistic when conducting the spatial analysis (see Figure 2).

### Determinants of Modern Contraceptive Use Among Married Women

The calculated ICC was 24.47%. This indicated that about 24% of the variability in using modern contraceptive methods was accounted for by location, leaving 76% of the variability to be accounted for by the differing characteristics of the women, or other unmeasured factors. The probability of using modern contraceptive methods in a typical region was estimated at 27.8%.

The strong individual-level predictors of modern contraceptive use among married women were their age, their husband/partner's education, household wealth, number of living children and exposure to family planning messages. Women who were in the age groups 35–39 years (44%), 40–44 years (55%) and 45–49 years (82%) were less likely to use modern contraceptives compared to those aged 15–19 years. A woman whose husband attained a primary level of education was 54% more likely to use modern contraceptives compared to those whose husband had no education. The odds ratio of modern contraceptive use increased with increasing wealth quintile. Women who were in the highest quintile were 5.26 times more likely to use the service compared to those in the lowest quintile. Women who had been exposed to family planning messages were 68% more likely to use modern contraceptives

1  
2  
3 relative to their counterparts with no exposure to family planning messages. Similarly, women  
4 who had one to four children were 2.31 times more likely to use the service compared to those  
5 having no child (see Table 4).  
6  
7

8  
9 At the regional level (level 2), only one variable was significantly associated with the use of  
10 modern contraceptives. A one-unit increase in the mean score of a health facility's readiness to  
11 provide short-term modern contraceptives in a typical region was associated with a 20-fold  
12 increase in the odds of modern contraceptive use (Table 4).  
13  
14  
15  
16

17 Finally, the majority of the variance between regions was explained by this model. The  
18 proportional change in variance indicated that the addition of predictors to the empty model  
19 explained an increased proportion of variation in modern contraceptive use. The variance  
20 estimates between regions decreased from 1.07 in the empty model to 0.18 in the final random  
21 intercept and random slope model. The proportion of variance explained by the final model  
22 was 83.51%. Similarly, the empty model showed that 24.47% of the variability in the odds of  
23 modern contraceptive use was explained by region-level characteristics (ICC = 24.47%). The  
24 between-region variability declined over successive models, from 24.47% in the empty model  
25 to 5.07% in the final model (see Table 5).  
26  
27  
28  
29  
30  
31  
32  
33  
34  
35  
36  
37  
38  
39  
40  
41  
42  
43  
44  
45  
46  
47  
48  
49  
50  
51  
52  
53  
54  
55  
56  
57  
58  
59  
60



Table 4: Factors Associated with Utilisation of Modern Contraceptives Among Married Women in Ethiopia ( $N = 8473$ )

| Predictors                                      |                                   | Model 2 <sup>a</sup><br>AOR (95% CI) | Model 3 <sup>b</sup><br>AOR (95% CI) | Model 4 <sup>c</sup><br>AOR (95% CI) |
|-------------------------------------------------|-----------------------------------|--------------------------------------|--------------------------------------|--------------------------------------|
| Level 1 predictor variables                     |                                   |                                      |                                      |                                      |
| Age                                             | 15–19                             | 1.00                                 | 1.00                                 | 1.00                                 |
|                                                 | 20–24                             | 1.21(0.94, 1.55)                     | 1.27(0.91, 1.76)                     | 1.26 (0.91, 1.76)                    |
|                                                 | 25–29                             | 0.92(0.71, 1.18)                     | 0.94(0.67, 1.31)                     | 0.93 (0.67, 1.30)                    |
|                                                 | 30–34                             | <b>0.74(0.57, 0.97)</b>              | 0.74(0.52, 1.04)                     | 0.74 (0.52, 1.04)                    |
|                                                 | 35–39                             | <b>0.60(0.45, 0.79)</b>              | <b>0.56(0.40, 0.80)</b>              | <b>0.56 (0.39, 0.80)</b>             |
|                                                 | 40–44                             | <b>0.50(0.37, 0.67)</b>              | <b>0.45(0.31, 0.65)</b>              | <b>0.45 (0.31, 0.65)</b>             |
| Husband/partner's level of education            | 45–49                             | <b>0.20(0.14, 0.28)</b>              | <b>0.18(0.12, 0.27)</b>              | <b>0.18 (0.12, 0.27)</b>             |
|                                                 | No education                      | 1.00                                 | 1.00                                 | 1.00                                 |
|                                                 | Primary                           | <b>1.38(1.21, 1.57)</b>              | <b>1.55(1.18, 2.04)</b>              | <b>1.54 (1.18, 2.02)</b>             |
|                                                 | Secondary                         | 1.18(0.98, 1.42)                     | 1.29(0.96, 1.74)                     | 1.29 (0.96, 1.73)                    |
| Wealth quintile                                 | Higher                            | 0.88(0.72, 1.08)                     | 1.06(0.77, 1.45)                     | 1.05 (0.77, 1.44)                    |
|                                                 | Lowest                            | 1.00                                 | 1.00                                 | 1.00                                 |
|                                                 | Second                            | <b>1.96(1.62, 2.38)</b>              | <b>1.96(1.27, 3.02)</b>              | <b>1.95 (1.27, 2.99)</b>             |
|                                                 | Middle                            | <b>2.53(2.09, 3.07)</b>              | <b>2.66(1.72, 4.13)</b>              | <b>2.65 (1.72, 4.08)</b>             |
|                                                 | Fourth                            | <b>3.14(2.58, 3.82)</b>              | <b>3.46(2.23, 5.37)</b>              | <b>3.42 (2.21, 5.28)</b>             |
| Number of living children                       | Highest                           | <b>5.09(4.17, 6.22)</b>              | <b>5.45(3.56, 8.33)</b>              | <b>5.26 (3.46, 7.99)</b>             |
|                                                 | 0                                 | 1.00                                 | 1.00                                 | 1.00                                 |
|                                                 | 1–4                               | <b>2.04(1.66, 2.50)</b>              | <b>2.31(1.65, 3.23)</b>              | <b>2.31 (1.64, 3.25)</b>             |
| Exposure to family planning messages            | >= 5                              | <b>1.96(1.52, 2.52)</b>              | <b>2.05(1.40, 3.00)</b>              | <b>2.05 (1.40, 3.01)</b>             |
|                                                 | No                                | 1.00                                 | 1.00                                 | 1.00                                 |
|                                                 | Yes                               | <b>1.49(1.28, 1.72)</b>              | <b>1.68(1.20, 2.34)</b>              | <b>1.68 (1.20, 2.36)</b>             |
| Level-2 predictor variables                     |                                   |                                      |                                      |                                      |
| General service readiness                       | Health facility management system |                                      |                                      | 1.27 (0.05, 35.69)                   |
|                                                 | Health facility infrastructure    |                                      |                                      | 1.51 (0.18, 12.95)                   |
| Family planning service availability            | Long-acting contraceptive methods |                                      |                                      | 5.04 (0.19, 136.21)                  |
|                                                 | Short-term contraceptive methods  |                                      |                                      | 1.79 (0.03, 103.48)                  |
| Family planning service readiness               | Long-acting contraceptives        |                                      |                                      | 0.43 (0.01, 17.12)                   |
|                                                 | Short-term contraceptives         |                                      |                                      | <b>20.49 (1.44, 29.54)</b>           |
| Average distance to the nearest health facility |                                   |                                      |                                      | 1.02 (0.81, 1.28)                    |

AOR = Adjusted Odds Ratio; CI = Confidence Interval; Model 2<sup>a</sup> is adjusted for individual-level factors; Model 3<sup>b</sup> is random slope and random intercept model adjusted for individual-level factors; Model 4<sup>c</sup> is the final model adjusted for individual- and region-level factors  
 N.B. Model 1 (Empty model) is not included in this table (but is in Table 5).

Table 5: Variations in modern contraceptive use in Ethiopia: random slope and random intercept model

| <b>Random effects<br/>(Measure of variation for modern<br/>contraceptive use)</b> | <b>Model 1<sup>a</sup></b> | <b>Model 2<sup>b</sup></b> | <b>Model 3<sup>c</sup></b> | <b>Model 4<sup>d</sup></b> |
|-----------------------------------------------------------------------------------|----------------------------|----------------------------|----------------------------|----------------------------|
| Region-level variance (SE)                                                        | 1.07 (0.47)                | 0.90 (0.47)                | 0.84 (0.38)                | 0.18 (0.16)                |
| P value                                                                           | <0.05                      | <0.05                      | <0.05                      | <0.05                      |
| Variance in age (SE)                                                              |                            |                            | 0.04 (0.02)                | 0.05 (0.02)                |
| P value                                                                           |                            |                            | <0.05                      | <0.05                      |
| Variance in husband/partner's level of<br>education variance (SE)                 |                            |                            | 0.06 (0.03)                | 0.05 (0.03)                |
| P value                                                                           |                            |                            | <0.05                      | <0.05                      |
| Variance in wealth quintile (SE)                                                  |                            |                            | 0.14 (0.05)                | 0.14 (0.05)                |
| P value                                                                           |                            |                            | <0.01                      | <0.01                      |
| Variance in number of living children<br>(SE)                                     |                            |                            | 0.08 (0.04)                | 0.08 (0.04)                |
| P value                                                                           |                            |                            | <0.05                      | <0.05                      |
| Variance in exposure to family planning<br>messages) (SE)                         |                            |                            | 0.08 (0.05)                | 0.09 (0.06)                |
| P value                                                                           |                            |                            | <0.05                      | >0.05                      |
| ICC (%)                                                                           | 24.47                      | 21.47                      | 20.43                      | 5.07                       |
| Explained variance (PCV) (%)                                                      | Reference                  | 15.61                      | 20.74                      | 83.51                      |
| <b>Model fit statistics</b>                                                       |                            |                            |                            |                            |
| AIC                                                                               | 9959.57                    | 9073.71                    | 8920.49                    | 8918.61                    |
| BIC                                                                               | 9960.36                    | 9080.87                    | 8932.43                    | 8927.76                    |

SE = Standard Error; ICC = Intra-Class Correlation; PCV = Percentage Change in Variance; CI = Confidence Interval; AIC = Akaike's Information Criterion; BIC = Schwarz's Bayesian Information Criteria; Model 1<sup>a</sup> is the null model, a baseline model without any determinant variable; Model 2<sup>b</sup> is adjusted for individual-level factors; Model 3<sup>c</sup> is random slope and random intercept model adjusted for individual-level factors; Model 4<sup>d</sup> is the final model adjusted for individual- and region-level factors

## Discussion

In Ethiopia, the use of modern contraception varied by region. This is the first study to specifically identify hot spots and model the use of modern contraception using nationwide population and health facility data. Approximately 34% of married women use modern contraceptives; the highest mCPR was reported among urban married women (46.09% versus 28.98%). This is comparable with the findings of the 2011 EDHS data analysis where 27.3% of married women reported using modern contraceptive methods; the highest proportion was from urban areas (49.55% versus 22.5%) (9). There are also variations in modern contraceptive rate across different regions in the country. The highest contraceptive rate, more than 50% mCPR, was reported in the Amhara region and the Addis Ababa city administration. Conversely, the lowest, below 10% mCPR, was reported in the Somali and Afar regions. Even though there has been an increase in modern contraceptive use all over the country, it was found that there was significant regional variation in modern contraceptive use.

High mCPR spots (hot spots) were detected in the Amhara region and Addis Ababa, followed by the SNNPR and some parts of Oromia region. Conversely, the majority of low mCPR (cold spots) were detected in the Somali, Afar and Gambela regions followed by Tigray and Benishangul-Gumuz. In 2011, hot spots of modern contraceptive use were observed in Addis Ababa, followed by some parts of Amhara, Oromia and SNNPR. The lowest contraceptive rates (cold spots) were observed in the Afar, Somali and Gambela regions, and some parts of Tigray region (9). This indicated that the government is doing a good job in some of the regions, but is less successful in most regions. Due to this reason, the unmet need for modern contraception will be much higher than expected in most of those regions. Thus, cold spots (low rates of modern contraception) will be much more concentrated in those areas.

In Ethiopia, the use of modern contraceptives varied across the different regions and city administrations. The highest modern contraceptive prevalence rate was reported in the Amhara region, followed by Addis Ababa and SNNPR. This variation is demonstrated by the national DHSs conducted every five years since 2000. Over 16 years, between 2000 and 2016, the Amhara region and SNNPR showed an increase in the utilisation of modern contraceptives (8, 31-33). The large increase in the use of modern contraceptives in the Amhara region, as well as SNNPR, might be related to the high number of family planning organisations and the government's focus on these regions.

1  
2  
3 Different individual and regional factors were significantly associated with the use of modern  
4 contraceptives. The readiness of health facilities to provide short-term modern contraceptives  
5 was the only regional (level-2) variable that was significantly associated with the use of modern  
6 contraceptives. It was found that a one-unit increase in the mean score of the readiness of health  
7 facilities to provide short-term modern contraceptives was significantly associated with the  
8 utilisation of modern contraceptives. In a study that used DHS and SPA survey data from  
9 several East African countries (Kenya, Uganda, Rwanda and Tanzania), it was found that  
10 modern contraceptive utilisation was strongly associated with health facilities offering a wide  
11 range of contraceptives, and with a higher score of family planning service environment (16).  
12 Even though it is not directly related, in a study carried out in rural Ethiopia, researchers found  
13 that women who lived close to a health facility providing a wide range of contraceptives were  
14 more likely to use modern contraceptives (11). This indicated that the potential impact of  
15 family planning services should not be underestimated. Therefore, family planning health  
16 facilities should be fully equipped to provide a wide range of modern contraception.  
17  
18

19  
20 Among the individual factors, an increase in the age of women was significantly associated  
21 with a decrease in the use of modern contraceptives. This is similar to results of other studies  
22 carried out in Ethiopia, where the utilisation of modern contraceptives was negatively  
23 influenced by an increase in the age of women (9, 11, 12). This could be related to the  
24 knowledge gap, beliefs and/or attitudes that each woman has; as the age of a woman increases,  
25 the probability of changing her attitudes or beliefs towards contraception may reduce.  
26  
27

28  
29 In Ethiopia, among the individual-level variables, the educational attainment of  
30 husband/partners was a significant predictor of the increase in modern contraceptive use. In a  
31 study conducted in the North Gondar, Amhara region of Ethiopia, it was found that the  
32 educational attainment of husbands was a significant predictor of women's contraceptive use  
33 (34). This might be due to the involvement of husbands in contraception decision-making. This  
34 is supported by other studies demonstrating the influence of discussing modern contraceptives  
35 with the husband and the husband's approval of using modern contraceptives (35, 36). It was  
36 found that the utilisation of modern contraceptives was significantly higher among women  
37 whose husbands had approved of using modern contraceptives. Similarly, the odds of using  
38 modern contraceptives was higher among those women who had discussed modern  
39 contraceptives with their husbands (35, 36). This indicated that a woman's husband's  
40  
41  
42  
43  
44  
45  
46  
47  
48  
49  
50  
51  
52  
53  
54  
55  
56  
57  
58  
59  
60

1  
2  
3 education, as well as male involvement, has an important role in the use of modern  
4 contraceptives. Thus, educational opportunities for men and increasing male involvement in  
5 every family planning service should be emphasised for higher engagement in the use of  
6 modern contraception.  
7  
8  
9

10  
11 The increase in household wealth was a significant predictor of an increase in modern  
12 contraceptive utilisation. In two studies conducted in Ethiopia, including a study performed  
13 among rural women (11), it was found that women who were in the fourth and highest quintile  
14 were more likely to use modern contraceptives (9, 11). Family monthly income was  
15 significantly associated with the use of modern contraceptives (35). Wealth might directly or  
16 indirectly affect modern contraceptive use. Women might know about the importance of  
17 contraception. However, knowledge alone will not be important in some cases. They should  
18 have money for transport and service. The trade-off associated with the time they spent on  
19 traveling to and from health facilities is also important. They may use that particular time for  
20 household activities, farming, or other business-generating activities. For instance, in Ethiopia,  
21 despite family planning services being free of charge in public health facilities, the cost of  
22 transport might be attributable to the use of modern contraception. Moreover, the costs of  
23 family planning services in private health facilities might also be related to the use of modern  
24 contraceptives. Thus, the cost of transport and family planning service fees in private health  
25 facilities might not be important for wealthy families.  
26  
27  
28  
29  
30  
31  
32  
33  
34  
35  
36  
37

38 In this current study, it was found that, compared to having no children, having one or more  
39 living children increases the likelihood a woman will use modern contraceptives. In the 2011  
40 EDHS data analysis (9) and a study done in the SNNPR (12), researchers also found that an  
41 increase in the number of living children was significantly associated with an increase in  
42 modern contraceptive use. Among rural women in Ethiopia, an increase in parity was positively  
43 associated with an increase in modern contraceptive use (11). This finding is similar to studies  
44 done in Bangladesh, Pakistan and Tanzania, where it was reported that an increase in the  
45 number of living children was significantly associated with an increase in the use of modern  
46 contraceptives (13, 37, 38). This indicated that women's desire to have children might  
47 influence their contraceptive use behaviours: women with a high number of living children  
48 may be more likely to use contraception.  
49  
50  
51  
52  
53  
54  
55  
56  
57  
58  
59  
60

1  
2  
3 Exposure to family planning messages, the last individual-level variable in the multilevel  
4 model, showed an increase in the likelihood of using modern contraception. In a study done  
5 among women of reproductive age in the SNNPR region, it was found that the odds of modern  
6 contraceptive utilisation were significantly associated with women's overall knowledge of  
7 family planning methods. It was observed that women with good family planning knowledge  
8 were more likely to use modern contraceptives (12). Thus, exposure to family planning  
9 messages through different public and private media outlets is an important recommendation  
10 arising from this study.  
11  
12

13  
14  
15  
16  
17  
18 In this study, it was found that the utilisation of modern contraceptives varied across regions.  
19 The individual-level variables (age, husband/partner's education, wealth, number of living  
20 children and exposure to family planning messages) varied significantly across the regions. In  
21 a study in rural Ethiopia, it was found that the use of modern contraceptives was significantly  
22 higher in the Amhara and SNNPR regions (11). This might be related to variations in the  
23 availability and accessibility of different family planning services across administrative regions  
24 of the country. In addition to the multilevel analysis, this study has identified the hot spot and  
25 cold spot areas to help the government in improving the provision of modern contraceptives,  
26 especially those areas with the low rates of modern contraception.  
27  
28  
29  
30  
31  
32  
33

34  
35 This study identified both the demand- and supply-side determinants of modern contraceptive  
36 utilisation using a linked population and health facility data. This was overlooked in previous  
37 studies, which generally studied these factors separately. In addition to multilevel analysis, this  
38 study used spatial analyses to identify geographic variations in modern contraceptive  
39 utilisation. Taking a geographic perspective on family planning is very important for effective  
40 resource allocation and intervention, informed decision-making, and monitoring and  
41 evaluation purposes.  
42  
43  
44  
45  
46  
47

48 This study had several methodological limitations, most of which were minimised (17). The  
49 exclusion of DHS clusters without information relating to geographic coordinates, and using  
50 sampled health facilities, may underestimate or overestimate our study findings. This study did  
51 not consider sampling weights while running the multilevel analysis. DHSs provide an average  
52 weight (hv005 or v005); however, the GLIMMIX procedure in SAS requires weights at each  
53 level. Due to this issue, we could not able to apply sampling weights in the multilevel analysis.  
54  
55  
56  
57  
58  
59  
60

## Conclusion

In this study, it was found that more than one-third of married women in Ethiopia use modern contraceptives. It was also found that different individual-level variables, as well as regional-level variables, were predictors of modern contraceptive use. There is evidence of wide geographic variations in the use of modern contraceptives across the country. The findings of this study have several implications: first, regions with low contraceptive rates and high fertility rates should be targeted for scaling up and tailoring of services to the lifestyles of their populations. Second, available health facilities should be equipped to provide modern contraceptive methods. Strong emphasis should also be given to the contraceptive method mix/choice available at each health facility to increase contraceptive uptake. Third, increasing educational opportunities for men and increasing male involvement, and exposure to family planning messages are also important recommendations to arise from this research. The importance of awareness and the potential impact of services cannot be underestimated.

## Abbreviations

|       |                                                    |
|-------|----------------------------------------------------|
| CRS   | Coordinate Reference System                        |
| DHS   | Demographic and Health Survey                      |
| EAs   | Enumeration Areas                                  |
| EDHS  | Ethiopia Demographic and Health Survey             |
| ESPA+ | Ethiopia Service Provision Assessment Plus         |
| FDR   | False Discovery Rate                               |
| GIS   | Geographic Information Systems                     |
| HGLM  | Hierarchical Generalized Linear Model              |
| ICC   | Intra-class Correlation Coefficient                |
| IUD   | Intrauterine Device                                |
| mCPR  | modern Contraceptive Prevalence Rate               |
| SNNPR | Southern Nations, Nationalities and Peoples Region |
| SPA   | Service Provision Assessment                       |
| WGS84 | World Geodetic System 84                           |

## **Ethics approval**

Ethical approval was obtained from the Human Research Ethics Committee, The University of Newcastle on March 20, 2018 with a reference number H-2018-0066. We also got the Ethiopian Public Health Institute (EPHI) and the Measure DHS program approval to access the datasets.

## **Consent for publication**

Not applicable.

## **Availability of data and material**

All data relevant to the study are included in the article.

## **Competing interests**

The authors declared that they have no competing interests.

## **Funding**

Not applicable.

## **Authors' contributions**

TKT, CC, RS, DL conceptualized the design of the analysis. TKT developed and drafted the manuscript. CC, PF, TG, RS and DL participated in critically revising the intellectual contents of the manuscript. All authors read, provided feedback and approved the final manuscript.

## **Acknowledgements**

We thank the University of Newcastle, Australia for offering free access to the digital online library to search the electronic databases that were considered for this analysis. We also thank the Measure DHS Program and the Ethiopian Public Health Institute for providing free access to the data sets used for this analysis.



## References

1. World Bank. World Development Indicators. Washington, DC: World Bank; 2009.
2. Darroch JE, Singh S, Nadeau J. Contraception: an investment in lives, health and development. Issues in brief (Alan Guttmacher Institute). 2008(5):1-4.
3. Cleland J, Bernstein S, Ezeh A, Faundes A, Glasier A, Innis J. Family planning: the unfinished agenda. *The Lancet*. 2006;368(9549):1810-27.
4. Tsui AO, McDonald-Mosley R, Burke AE. Family planning and the burden of unintended pregnancies. *Epidemiologic reviews*. 2010;32(1):152-74.
5. Stover J, Winfrey W. The effects of family planning and other factors on fertility, abortion, miscarriage, and stillbirths in the Spectrum model. *BMC Public Health*. 2017;17(4):775.
6. Bearak J, Popinchalk A, Alkema L, Sedgh G. Global, regional, and subregional trends in unintended pregnancy and its outcomes from 1990 to 2014: estimates from a Bayesian hierarchical model. *Lancet Glob Health*. 2018;6(4):e380-e9.
7. Ba DM, Ssentongo P, Agbese E, Kjerulff KH. Prevalence and Predictors of contraceptive use among women of reproductive age in 17 sub-Saharan African countries: A large population-based study. *Sexual & Reproductive Healthcare*. 2019.
8. Central Statistical Agency (CSA) [Ethiopia], ICF. Ethiopia Demographic and Health Survey 2016. Addis Ababa, Ethiopia, and Rockville, Maryland, USA: CSA and ICF; 2016.
9. Lakew Y, Reda AA, Tamene H, Benedict S, Deribe K. Geographical variation and factors influencing modern contraceptive use among married women in Ethiopia: evidence from a national population based survey. *Reprod Health*. 2013;10(1):52.
10. Mandiwa C, Namondwe B, Makwinja A, Zamawe C. Factors associated with contraceptive use among young women in Malawi: analysis of the 2015–16 Malawi demographic and health survey data. *Contraception and Reproductive Medicine*. 2018;3(1):12.
11. Shiferaw S, Spigt M, Seme A, Amogne A, Skråvseth S, Desta S, et al. Does proximity of women to facilities with better choice of contraceptives affect their contraceptive utilization in rural Ethiopia? *PLoS ONE*. 2017;12(11):e0187311.
12. Endriyas M, Eshete A, Mekonnen E, Misganaw T, Shiferaw M, Ayele S. Contraceptive utilization and associated factors among women of reproductive age group in Southern Nations Nationalities and Peoples' Region, Ethiopia: cross-sectional survey, mixed-methods. *Contraception and reproductive medicine*. 2017;2(1):10.
13. Stephenson R, Hennink M. Barriers to family planning service use among the urban poor in Pakistan. *Asia-Pacific Population Journal*. 2004;19(2):5-26.
14. Hong R, Montana L, Mishra V. Family planning services quality as a determinant of use of IUD in Egypt. *BMC Health Serv Res*. 2006;6(1):79.
15. Rose M, Abderrahim N, Stanton C, Helsel D. Maternity Care: A Comparative Report on the Availability and Use of Maternity Services. Data from the Demographic and Health Surveys Women's Module & Services Availability Module 1993-1996. MEASURE Evaluation Technical Report Series No. 9. Carolina Population Center, University of North Carolina at Chapel Hill; 2001.
16. Wang W, Wang S, Pullum T, Ametepi P. How family planning supply and the service environment affect contraceptive use: Findings from four East African countries. DHS Analytical Studies No. 26. Calverton, Maryland, USA: ICF International; 2012.
17. Tegegne TK, Chojenta C, Getachew T, Smith R, Loxton D. Service environment link and false discovery rate correction: Methodological considerations in population and health facility surveys. *PLoS ONE*. 2019;14(7):e0219860.

18. Burgert C, Zachary B. Incorporating geographic information into Demographic and Health Surveys: a field guide to GPS data collection. Calverton, Maryland USA: ICF International; 2013.
19. Ethiopian Public Health Institute, ICF International. Ethiopia Service Provision Assessment Plus (ESPA+) Survey 2014. Addis Ababa, Ethiopia and Rockville, Maryland USA: Ethiopian Public Health Institute and ICF International; 2014.
20. Natural Earth. Free vector and raster map data [cited 31/05/2019. Available from: <https://www.naturalearthdata.com/downloads/10m-cultural-vectors/>.
21. Ene M, Leighton EA, Blue GL, Bell BA, editors. Multilevel models for categorical data using SAS® PROC GLIMMIX: The basics. SAS Global Forum 2015 Proceedings; 2015.
22. Tom A, Bosker TASRJ, Bosker RJ. Multilevel analysis: an introduction to basic and advanced multilevel modeling: Sage; 1999.
23. Merlo J, Yang M, Chaix B, Lynch J, Råstam L. A brief conceptual tutorial on multilevel analysis in social epidemiology: investigating contextual phenomena in different groups of people. *J Epidemiol Community Health*. 2005;59(9):729-36.
24. Merlo J, Chaix B, Ohlsson H, Beckman A, Johnell K, Hjerpe P, et al. A brief conceptual tutorial of multilevel analysis in social epidemiology: using measures of clustering in multilevel logistic regression to investigate contextual phenomena. *J Epidemiol Community Health*. 2006;60(4):290-7.
25. Goldstein H. Multilevel statistical models: John Wiley & Sons; 2011.
26. Vrieze SI. Model selection and psychological theory: a discussion of the differences between the Akaike information criterion (AIC) and the Bayesian information criterion (BIC). *Psychological methods*. 2012;17(2):228.
27. Gagné P, Dayton CM. Best regression model using information criteria. *Journal of Modern Applied Statistical Methods*. 2002;1(2):57.
28. Hirotsugu A. A new look at the statistical model identification. *IEEE Transactions on Automatic Control*. 1974;19(6):716-23.
29. Anselin L. Local indicators of spatial association—LISA. *Geographical analysis*. 1995;27(2):93-115.
30. Caldas de Castro M, Singer BH. Controlling the false discovery rate: a new application to account for multiple and dependent tests in local statistics of spatial association. *Geographical Analysis*. 2006;38(2):180-208.
31. Central Statistical Authority [Ethiopia], Macro O. Ethiopia Demographic and Health Survey 2000. Addis Ababa, Ethiopia and Calverton, Maryland, USA: Central Statistical Authority and ORC Macro.; 2001.
32. Central Statistical Agency [Ethiopia], ORC Macro. Ethiopia Demographic and Health Survey 2005. Addis Ababa, Ethiopia and Calverton, Maryland, USA: Central Statistical Agency and ORC Macro. ; 2006.
33. Central Statistical Agency [Ethiopia], ICF International. Ethiopia Demographic and Health Survey 2011. Addis Ababa, Ethiopia and Calverton, Maryland, USA: Central Statistical Agency and ICF International; 2012.
34. Kebede Y. Contraceptive prevalence in dembia district, northwest Ethiopia. *Ethiopian Journal of health development*. 2006;20(1):32-8.
35. Mohammed A, Woldeyohannes D, Feleke A, Megabiaw B. Determinants of modern contraceptive utilization among married women of reproductive age group in North Shoa Zone, Amhara Region, Ethiopia. *Reprod Health*. 2014;11(1):13.
36. Abraham W, Adamu A, Deresse D. The involvement of men in family planning an application of transtheoretical model in Wolaita Soddo Town South Ethiopia. *Asian Journal of Medical Sciences*. 2010;2(2):44-50.

- 1  
2  
3 37. Mostafa Kamal S, Aynul Islam M. Contraceptive use: socioeconomic correlates and  
4 method choices in rural Bangladesh. *Asia Pacific Journal of Public Health*. 2010;22(4):436-  
5 50.  
6  
7 38. Lwelamira J, Mnyamagola G, Msaki M. Knowledge, Attitude and Practice (KAP) towards  
8 modern contraceptives among married women of reproductive age in Mpwapwa District,  
9 Central Tanzania. *Current Research Journal of Social Sciences*. 2012;4(3):235-45.  
10  
11  
12

### 13 **Figure Legends**

14  
15 Figure 1: Modern contraceptive use among married women in Ethiopia, 2016

16  
17 Figure 2: Clusters of high and low modern contraceptive prevalence rates in Ethiopia, 2016  
18  
19  
20  
21  
22  
23  
24  
25  
26  
27  
28  
29  
30  
31  
32  
33  
34  
35  
36  
37  
38  
39  
40  
41  
42  
43  
44  
45  
46  
47  
48  
49  
50  
51  
52  
53  
54  
55  
56  
57  
58  
59  
60

1  
2  
3  
4  
5  
6  
7  
8  
9  
10  
11  
12  
13  
14  
15  
16  
17  
18  
19  
20  
21  
22  
23  
24  
25  
26  
27  
28  
29  
30  
31  
32  
33  
34  
35  
36  
37  
38  
39  
40  
41  
42  
43  
44  
45  
46  
47  
48  
49  
50  
51  
52  
53  
54  
55  
56  
57  
58  
59  
60

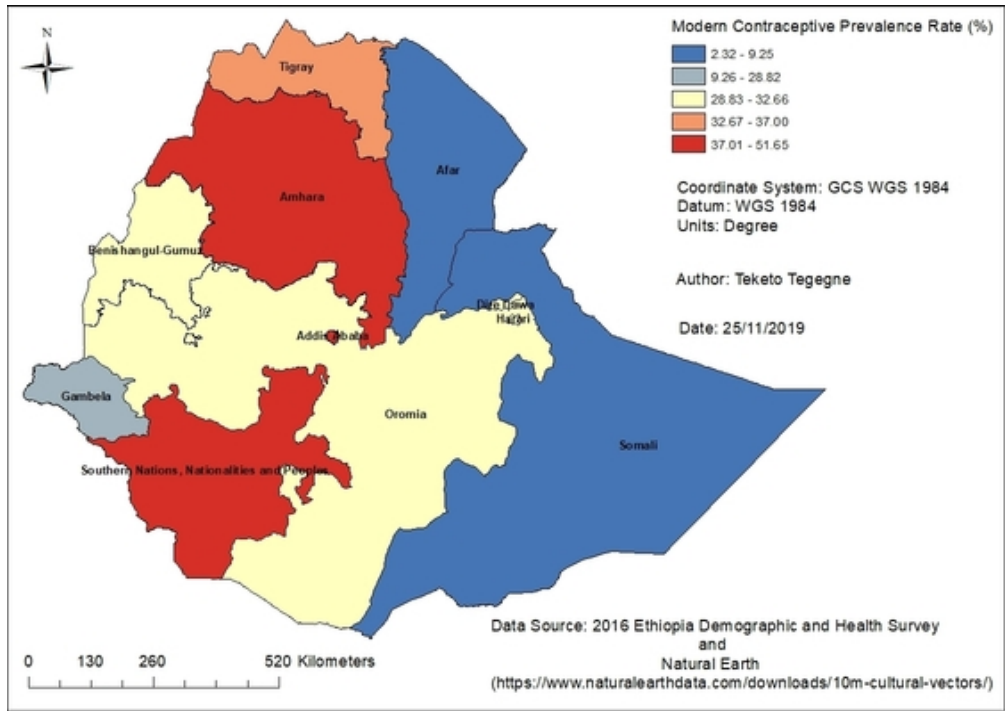

47x33mm (300 x 300 DPI)

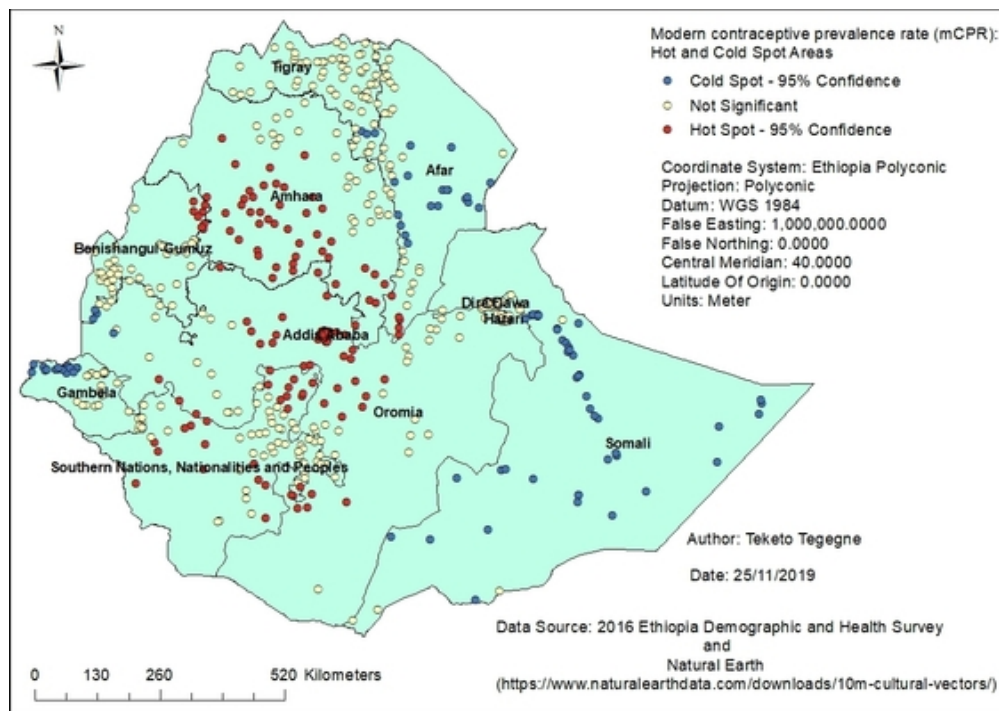

47x33mm (300 x 300 DPI)

STROBE Statement—Checklist of items that should be included in reports of *cross-sectional studies*

|                              | Item No | Recommendation                                                                                                                                                                                               | Page No |
|------------------------------|---------|--------------------------------------------------------------------------------------------------------------------------------------------------------------------------------------------------------------|---------|
| <b>Title and abstract</b>    | 1       | (a) Indicate the study's design with a commonly used term in the title or the abstract                                                                                                                       | 1       |
|                              |         | (b) Provide in the abstract an informative and balanced summary of what was done and what was found                                                                                                          | 2       |
| <b>Introduction</b>          |         |                                                                                                                                                                                                              |         |
| Background/rationale         | 2       | Explain the scientific background and rationale for the investigation being reported                                                                                                                         | 4 - 5   |
| Objectives                   | 3       | State specific objectives, including any prespecified hypotheses                                                                                                                                             | 5       |
| <b>Methods</b>               |         |                                                                                                                                                                                                              |         |
| Study design                 | 4       | Present key elements of study design early in the paper                                                                                                                                                      | 5 - 6   |
| Setting                      | 5       | Describe the setting, locations, and relevant dates, including periods of recruitment, exposure, follow-up, and data collection                                                                              | 5 - 6   |
| Participants                 | 6       | (a) Give the eligibility criteria, and the sources and methods of selection of participants                                                                                                                  | 5 - 6   |
| Variables                    | 7       | Clearly define all outcomes, exposures, predictors, potential confounders, and effect modifiers. Give diagnostic criteria, if applicable                                                                     | 6 - 7   |
| Data sources/<br>measurement | 8*      | For each variable of interest, give sources of data and details of methods of assessment (measurement). Describe comparability of assessment methods if there is more than one group                         | 5 - 7   |
| Bias                         | 9       | Describe any efforts to address potential sources of bias                                                                                                                                                    | 5 - 6   |
| Study size                   | 10      | Explain how the study size was arrived at                                                                                                                                                                    | 5 - 6   |
| Quantitative variables       | 11      | Explain how quantitative variables were handled in the analyses. If applicable, describe which groupings were chosen and why                                                                                 | 7 - 8   |
| Statistical methods          | 12      | (a) Describe all statistical methods, including those used to control for confounding                                                                                                                        | 8       |
|                              |         | (b) Describe any methods used to examine subgroups and interactions                                                                                                                                          | 8       |
|                              |         | (c) Explain how missing data were addressed                                                                                                                                                                  | 8       |
|                              |         | (d) If applicable, describe analytical methods taking account of sampling strategy                                                                                                                           |         |
|                              |         | (e) Describe any sensitivity analyses                                                                                                                                                                        |         |
| <b>Results</b>               |         |                                                                                                                                                                                                              |         |
| Participants                 | 13*     | (a) Report numbers of individuals at each stage of study—eg numbers potentially eligible, examined for eligibility, confirmed eligible, included in the study, completing follow-up, and analysed            | 9 - 16  |
|                              |         | (b) Give reasons for non-participation at each stage                                                                                                                                                         | 9 - 16  |
|                              |         | (c) Consider use of a flow diagram                                                                                                                                                                           | 9 - 16  |
| Descriptive data             | 14*     | (a) Give characteristics of study participants (eg demographic, clinical, social) and information on exposures and potential confounders                                                                     | 9 - 16  |
|                              |         | (b) Indicate number of participants with missing data for each variable of interest                                                                                                                          | 9 - 16  |
| Outcome data                 | 15*     | Report numbers of outcome events or summary measures                                                                                                                                                         | 14 - 15 |
| Main results                 | 16      | (a) Give unadjusted estimates and, if applicable, confounder-adjusted estimates and their precision (eg, 95% confidence interval). Make clear which confounders were adjusted for and why they were included | 14 - 16 |

|                          |    |                                                                                                                                                                            |         |
|--------------------------|----|----------------------------------------------------------------------------------------------------------------------------------------------------------------------------|---------|
|                          |    | (b) Report category boundaries when continuous variables were categorized                                                                                                  | 16      |
|                          |    | (c) If relevant, consider translating estimates of relative risk into absolute risk for a meaningful time period                                                           |         |
| Other analyses           | 17 | Report other analyses done—eg analyses of subgroups and interactions, and sensitivity analyses                                                                             | 15      |
| <b>Discussion</b>        |    |                                                                                                                                                                            |         |
| Key results              | 18 | Summarise key results with reference to study objectives                                                                                                                   | 17      |
| Limitations              | 19 | Discuss limitations of the study, taking into account sources of potential bias or imprecision. Discuss both direction and magnitude of any potential bias                 | 3, 20   |
| Interpretation           | 20 | Give a cautious overall interpretation of results considering objectives, limitations, multiplicity of analyses, results from similar studies, and other relevant evidence | 17 – 20 |
| Generalisability         | 21 | Discuss the generalisability (external validity) of the study results                                                                                                      | 21      |
| <b>Other information</b> |    |                                                                                                                                                                            |         |
| Funding                  | 22 | Give the source of funding and the role of the funders for the present study and, if applicable, for the original study on which the present article is based              | 22      |

\*Give information separately for exposed and unexposed groups.

**Note:** An Explanation and Elaboration article discusses each checklist item and gives methodological background and published examples of transparent reporting. The STROBE checklist is best used in conjunction with this article (freely available on the Web sites of PLoS Medicine at <http://www.plosmedicine.org/>, Annals of Internal Medicine at <http://www.annals.org/>, and Epidemiology at <http://www.epidem.com/>). Information on the STROBE Initiative is available at [www.strobe-statement.org](http://www.strobe-statement.org).
